# Supplementary material for: Highly specific chimeric DNA-RNA-guided genome editing with enhanced CRISPR-Cas12a system
Source: PubMed Central journal article supplement — Mol Ther Nucleic Acids. 2022 Mar 28;28:353–62. doi: 10.1016/j.omtn.2022.03.021 (PMC9035383; doi:10.1016/j.omtn.2022.03.021), 2022-03-28
Supplement: mmc1.pdf [file mmc1.pdf]

**Supplemental information**

**Highly specific chimeric DNA-RNA-guided genome  
editing with enhanced CRISPR-Cas12a system**

**Hanseop Kim, Wi-jae Lee, Chan Hyoung Kim, Yeounsun Oh, Lee Wha Gwon, Hyomin Lee, Woojeung Song, Junho K. Hur, Kyung-Seob Lim, Kang Jin Jeong, Ki-Hoan Nam, Young-Suk Won, Kyeong-Ryoon Lee, Youngjeon Lee, Young-Hyun Kim, Jae-Won Huh, Bong-Hyun Jun, Dong-Seok Lee, and Seung Hwan Lee**

## Supplemental Material

### Supplementary Tables

**Table S1. Sequence information of the synthesized wt- and chimeric crRNAs for AsCas12a.**

| Target gene<br>guide ID      | Target sequence (5'-3')              | crRNA sequence for AsCas12a (5'-3')                                          |
|------------------------------|--------------------------------------|------------------------------------------------------------------------------|
| hDNMT1_site1<br><b>WT</b>    | <b>TTTC</b> CTGATGGTCCATGTCTGTACTCG  | 5'UAAUUUCUACUCUUGUAGAUCUGAUGGUC<br>CAUGUCUGUUACUCG 3'                        |
| hDNMT1_site1<br><b>8DNA</b>  |                                      | 5'UAAUUUCUACUCUUGUAGAUCUGAUGGUC<br>CAUGUCU <b>GTTACTCG</b> 3'                |
| hDNMT1_site1<br><b>12DNA</b> |                                      | 5'UAAUUUCUACUCUUGUAGAUCUGAUGGUC<br>CAU <b>G</b> TCT <b>GTTACTCG</b> 3'       |
| hDNMT1_site1<br><b>16DNA</b> |                                      | 5'UAAUUUCUACUCUUGUAGAUCUGAUGGUC<br><b>CATG</b> TCT <b>GTTACTCG</b> 3         |
| hDNMT1_site1<br><b>20DNA</b> |                                      | 5'UAAUUUCUACUCUUGUAGAUCUGAT <b>GGTCC</b><br><b>ATG</b> TCT <b>GTTACTCG</b> 3 |
| hDNMT1_site1<br><b>24DNA</b> |                                      | 5'UAAUUUCUACUCUUGUAGAU <b>CTGATGGTCC</b><br><b>ATG</b> TCT <b>GTTACTCG</b> 3 |
| hDNMT1_site1<br><b>44DNA</b> |                                      | 5' <b>TAATTTCTACTCTTGTAGATCTGATGGTCCAT</b><br><b>GTCTGTTACTCG</b> 3'         |
| hDNMT1_site2<br><b>WT</b>    | <b>TTTG</b> GCTCAGCAGGCACCTGCCTCAGCT | 5'UAAUUUCUACUCUUGUAGAUGCUCAGCAG<br>GCACCUGCCUCAGCU 3'                        |
| hDNMT1_site2<br><b>8DNA</b>  |                                      | 5'UAAUUUCUACUCUUGUAGAUGCUCAGCAG<br>GCACCUG <b>CCTCAGCT</b> 3'                |
| hCCR5_site1<br><b>WT</b>     | <b>TTTA</b> TGCACAGGGTGAACAAGATGGAT  | 5'UAAUUUCUACUCUUGUAGAUUGCACAGGG<br>UGGAACAAGAUGGAU 3'                        |
| hCCR5_site1<br><b>8DNA</b>   |                                      | 5'UAAUUUCUACUCUUGUAGAUUGCACAGGG<br>UGGAACA <b>AGATGGAT</b> 3'                |
| hCCR5_site1<br><b>12DNA</b>  |                                      | 5'UAAUUUCUACUCUUGUAGAUUGCACAGGG<br>UGG <b>AACAAGATGGAT</b> 3'                |
| hCCR5_site1<br><b>16DNA</b>  |                                      | 5'UAAUUUCUACUCUUGUAGAUUGCACAGGG<br><b>TGGAACAAGATGGAT</b> 3'                 |
| hCCR5_site1<br><b>20DNA</b>  |                                      | 5'UAAUUUCUACUCUUGUAGAUUGC <b>CAGGG</b><br><b>TGGAACAAGATGGAT</b> 3'          |
| hCCR5_site1<br><b>24DNA</b>  |                                      | 5'UAAUUUCUACUCUUGUAGAU <b>TGCACAGGG</b><br><b>TGGAACAAGATGGAT</b> 3'         |
| hCCR5_site1<br><b>44DNA</b>  |                                      | 5' <b>TAATTTCTACTCTTGTAGATTGCACAGGGTG</b><br><b>GAACAAGATGGAT</b> 3'         |
| hCCR5_site2<br><b>WT</b>     | <b>TTTT</b> GTGGGCAACATGCTGGTCATCCTC | 5'UAAUUUCUACUCUUGUAGAUGUGGGCAAC<br>AUGCUGGUCAUCCUC 3'                        |
| hCCR5_site2<br><b>8DNA</b>   |                                      | 5'UAAUUUCUACUCUUGUAGAUGUGGGCAAC<br>AUGCUG <b>GTATCCTC</b> 3'                 |
| hCCR5_site2<br><b>9DNA</b>   |                                      | 5'UAAUUUCUACUCUUGUAGAUGUGGGCAAC<br>AUGCUG <b>GTATCCTC</b> 3'                 |
| hCCR5_site2<br><b>10DNA</b>  |                                      | 5'UAAUUUCUACUCUUGUAGAUGUGGGCAAC<br>AUGCUG <b>GTATCCTC</b> 3'                 |
| hCCR5_site2<br><b>11DNA</b>  |                                      | 5'UAAUUUCUACUCUUGUAGAUGUGGGCAAC<br>AUG <b>TGGTATCCTC</b> 3'                  |
| hCCR5_site2<br><b>12DNA</b>  |                                      | 5'UAAUUUCUACUCUUGUAGAUGUGGGCAAC<br>AUG <b>CTGGTATCCTC</b> 3'                 |
| hCCR5_site2                  |                                      | 5'UAAUUUCUACUCUUGUAGAUGUGGGCAAC                                              |
| hCCR5_site2                  |                                      | 5'UAAUUUCUACUCUUGUAGAUGUGGGCAAC                                              |

|                             |                              |                                                                       |
|-----------------------------|------------------------------|-----------------------------------------------------------------------|
| <b>16DNA</b>                |                              | <b>ATGCTGGTCATCCTC</b> 3'                                             |
| hCCR5_site2<br><b>20DNA</b> |                              | 5'UAAUUUCUACUCUUGUAGAUGUGG <b>GCAAC</b><br><b>ATGCTGGTCATCCTC</b> 3'  |
| hCCR5_site2<br><b>24DNA</b> |                              | 5'UAAUUUCUACUCUUGUAGAUG <b>GTGGGCAAC</b><br><b>ATGCTGGTCATCCTC</b> 3' |
| hCCR5_site2<br><b>44DNA</b> |                              | 5' <b>TAATTTCTACTCTTGTAGATGTGGGCAACATG</b><br><b>CTGGTCATCCTC</b> 3'  |
| hIL12A-AS1<br><b>WT</b>     | TTTAGGATGCCACTAAAAGGGAAAGGGG | 5'UAAUUUCUACUCUUGUAGAUGGAUGCCAC<br>UAAAAGGGAAAGGGG 3'                 |
| hIL12A-AS1<br><b>8DNA</b>   |                              | 5'UAAUUUCUACUCUUGUAGAUGGAUGCCAC<br>UAAAAGG <b>GAAAGGGG</b> 3'         |
| hIL12A-AS1<br><b>12DNA</b>  |                              | 5'UAAUUUCUACUCUUGUAGAUGGAUGCCAC<br>UAAAAGG <b>GAAAGGGG</b> 3'         |
| hIL12A-AS1<br><b>16DNA</b>  |                              | 5'UAAUUUCUACUCUUGUAGAUGGAUGCCAC<br><b>TAAAAGGGAAAGGGG</b> 3'          |
| hIL12A-AS1<br><b>20DNA</b>  |                              | 5'UAAUUUCUACUCUUGUAGAUGGAU <b>GCCAC</b><br><b>TAAAAGGGAAAGGGG</b> 3'  |
| hIL12A-AS1<br><b>24DNA</b>  |                              | 5'UAAUUUCUACUCUUGUAGAUG <b>GGATGCCACT</b><br><b>AAAAGGGAAAGGGG</b> 3' |
| hIL12A-AS1<br><b>44DNA</b>  |                              | 5' <b>TAATTTCTACTCTTGTAGATGGATGCCACTAA</b><br><b>AAGGGAAAGGGG</b> 3'  |
| hAAVS1<br><b>WT</b>         | TTTGCTTACGATGGAGCCAGAGAGGATC | 5'UAAUUUCUACUCUUGUAGAUCUUACGAUG<br>GAGCCAGAGAGGAUC 3'                 |
| hAAVS1<br><b>8DNA</b>       |                              | 5'UAAUUUCUACUCUUGUAGAUCUUACGAUG<br>GAGCCAG <b>AGAGGATC</b> 3'         |
| hFANCF<br><b>WT</b>         | TTTGGCGGGGTCCAGTCCGGGATTAG   | 5'UAAUUUCUACUCUUGUAGAUGGCGGGGUC<br>CAGUCCGGGAUUAG 3'                  |
| hFANCF<br><b>8DNA</b>       |                              | 5'UAAUUUCUACUCUUGUAGAUGGCGGGGUC<br>CAGUCC <b>GGGATTAG</b> 3'          |

†PAM sequences (TTTN) for AsCpf1 in the target DNA are shown in blue and substituted DNA sequences in (cr)RNA are shown in red, respectively.

**Table S2. Sequence information of the sgRNA for nickase SpCas9(D10A) used in this study.**

| Target gene                  | CRISPR-Cas9 target sequence (5'-3') | sgRNA sequence for dead or nickase SpCas9 (5'-3')                                                                        |
|------------------------------|-------------------------------------|--------------------------------------------------------------------------------------------------------------------------|
| hDNMT1_site1<br><b>sgRNA</b> | GAGTGCTAAGGGAAACGTT <b>CAGG</b>     | 5' <b>GGAGUGCUAAGGGAAACGUUCAGUUUUUAGAGCU</b><br>AGAAAUAGCAAGUUAAAAUAAGGCUAGUCCGUUA<br>UCAACUUGAAAAAGUGGCACCGAGUCGGUGC 3' |
| hDNMT1_site2<br><b>sgRNA</b> | CCAGCAGCCAACCTGACCA <b>AAGG</b>     | 5' <b>GCCAGCAGCCAACCUGACCAAGUUUUAGAGCUA</b><br>GAAAUAGCAAGUUAAAAUAAGGCUAGUCCGUUAU<br>CAACUUGAAAAAGUGGCACCGAGUCGGUGC 3'   |
| hCCR5_site1<br><b>sgRNA</b>  | TAATAATTGATGTCATAGAT <b>TGG</b>     | 5' <b>GJAAUAAUUGAUGUCAUAGAUGUUUUUAGAGCUA</b><br>GAAAUAGCAAGUUAAAAUAAGGCUAGUCCGUUAU<br>CAACUUGAAAAAGUGGCACCGAGUCGGUGC 3'  |
| hCCR5_site2<br><b>sgRNA</b>  | AACACCAGTGAGTAGAGCG <b>GAGG</b>     | 5' <b>GAACACCAGUGAGUAGAGCGGUUUUAGAGCU</b><br>AGAAAUAGCAAGUUAAAAUAAGGCUAGUCCGUUA<br>UCAACUUGAAAAAGUGGCACCGAGUCGGUGC 3'    |
| AAVS1<br><b>sgRNA</b>        | GCAAGGAGAGAGATGGCT <b>CAGG</b>      | 5' <b>GGCAAGGAGAGAGAUGGCCUCCGUUUUAGAGCU</b><br>AGAAAUAGCAAGUUAAAAUAAGGCUAGUCCGUUA<br>UCAACUUGAAAAAGUGGCACCGAGUCGGUGC 3'  |
| IL12A-AS1<br><b>sgRNA</b>    | TTCTGGGGTCAACATCTTGG <b>TGG</b>     | 5' <b>GUUCUGGGGUCAACAUCUUGGUUUUAGAGCUA</b><br>GAAAUAGCAAGUUAAAAUAAGGCUAGUCCGUUAU<br>CAACUUGAAAAAGUGGCACCGAGUCGGUGC 3'    |

|                |                         |                                                                                                                         |
|----------------|-------------------------|-------------------------------------------------------------------------------------------------------------------------|
| FANCF<br>sgRNA | CCGCTCCAGAGCCGTGCGAATGG | 5' <u>GCCGCUCCAGAGCCGUGCGAAGUUUUAGAGCUA</u><br>GAAAUAGCAAGUUAAAAUAAGGCUAGUCCGUUUAU<br>CAACUUGAAAAAGUGGCACCGAGUCGGUGC 3' |
|----------------|-------------------------|-------------------------------------------------------------------------------------------------------------------------|

†PAM sequence (NGG) in the target DNA for the SpCas9 nickase (D10A) is shown in blue.

Underlined sequence in sgRNA indicates the target sequence.

**Table S3. Sequence information for DNA primers used in this study.**

| Target gene<br>(primer direction) | DNA sequence (5' to 3')                                               |
|-----------------------------------|-----------------------------------------------------------------------|
| hDNMT1_site1_On_F                 | GGAGATCAAGCTTTGTATGTTG                                                |
| hDNMT1_site1_On_R                 | CCAGAATGCACAAAGTACTGC                                                 |
| hDNMT1_site1_On_F2                | CTGTGAGGATTGAGTGAGTTG                                                 |
| hDNMT1_site1_On_R2                | CACACATGTGAACGGACAGA                                                  |
| hDNMT1_site1_On_Adapter_F         | <u>ACACTCTTTCCCTACACGACGCTCTTCCGATCT</u> GGAGTG<br>TTCAGTCTCCGTGA     |
| hDNMT1_site1_On_Adapter_R         | <u>GTGACTGGAGTTCAGACGTGTGCTCTTCCGATCT</u> CCTTA<br>GCAGTCTCCTCCTC     |
| hDNMT1_site1_OT1_F                | CAGGGGTATTTTCTTCAAGA                                                  |
| hDNMT1_site1_OT1_R                | TCAGGAATACCAACATGGAAAA                                                |
| hDNMT1_site1_OT1_Adapter_F        | <u>ACACTCTTTCCCTACACGACGCTCTTCCGATCT</u> TGTGTG<br>TCTGCTGGAAGCTC     |
| hDNMT1_site1_OT1_Adapter_R        | <u>GTGACTGGAGTTCAGACGTGTGCTCTTCCGATCT</u> CAGCA<br>GATAGGGTCTGTGCTC   |
| hDNMT1_site2_On_F                 | ACACAACAGCTTCATGTCAG                                                  |
| hDNMT1_site2_On_R                 | TTGGCTTGGAGATCAAGCTT                                                  |
| hDNMT1_site2_On_Adapter_F         | <u>ACACTCTTTCCCTACACGACGCTCTTCCGATCT</u> GCAGAG<br>TGCTAAGGGAACGT     |
| hDNMT1_site2_On_Adapter_R         | <u>GTGACTGGAGTTCAGACGTGTGCTCTTCCGATCT</u> AAGTG<br>CTTAGAGCAGGCGTG    |
| hDNMT1_site2_OT1_F                | CTGAGCTGGTATCCAAGATGC                                                 |
| hDNMT1_site2_OT1_R                | GCATTGTCATTAGAACCACAAATC                                              |
| hDNMT1_site2_OT1_Adapter_F        | <u>ACACTCTTTCCCTACACGACGCTCTTCCGATCT</u> GCAGAA<br>GTGAGTCTTGCTGAG    |
| hDNMT1_site2_OT1_Adapter_R        | <u>GTGACTGGAGTTCAGACGTGTGCTCTTCCGATCT</u> CAGAA<br>TCTGTGCACTCGGAG    |
| hDNMT1_site2_OT2_F                | GTTGCAGTGAGCCAAGATCA                                                  |
| hDNMT1_site2_OT2_R                | TCTTGAACCAATCCTCTGC                                                   |
| hDNMT1_site2_OT2_Adapter_F        | <u>ACACTCTTTCCCTACACGACGCTCTTCCGATCT</u> AAGCAG<br>TGCTTCTCCATTGAG    |
| hDNMT1_site2_OT2_Adapter_R        | <u>GTGACTGGAGTTCAGACGTGTGCTCTTCCGATCT</u> TTACG<br>CCATGGGTGATAGTG    |
| hDNMT1_site2_OT3_F                | GCAACCAGATTTTCTCCTCCA                                                 |
| hDNMT1_site2_OT3_R                | CCAAGCCGTTACAGATGGTT                                                  |
| hDNMT1_site2_OT3_Adapter_F        | <u>ACACTCTTTCCCTACACGACGCTCTTCCGATCT</u> GGCAAT<br>GGACTCTGGGATAG     |
| hDNMT1_site2_OT3_Adapter_R        | <u>GTGACTGGAGTTCAGACGTGTGCTCTTCCGATCT</u> CGGG<br>TTGTGAACAGGAAACT    |
| hCCR5_site1_On_F                  | ACCATGCTTGACCCAGTTTC                                                  |
| hCCR5_site1_On_R                  | AAACACAGCATGGACGACAG                                                  |
| hCCR5_site1_On_Adapter_F          | <u>ACACTCTTTCCCTACACGACGCTCTTCCGATCT</u> CAATGTA<br>GACATCTATGTAGGCAA |
| hCCR5_site1_On_Adapter_R          | <u>GTGACTGGAGTTCAGACGTGTGCTCTTCCGATCT</u> CTGCG<br>ATTTGCTTACATTG     |
| hCCR5_site1_OT1_F                 | CAAGCAATTCTTGTGCCTCA                                                  |

|                           |                                                                |
|---------------------------|----------------------------------------------------------------|
| hCCR5_site1_OT1_R         | TCCAGGCCCTGTATACTTGC                                           |
| hCCR5_site1_OT1_Adapter_F | ACACTCTTTCCCTACACGACGCTCTTCCGATCTAGGGTC<br>AACATTGCAAGGAG      |
| hCCR5_site1_OT1_Adapter_R | GTGACTGGAGTTCAGACGTGTGCTCTTCCGATCTTCAAA<br>GCCATTCTGGAAAAGA    |
| hCCR5_site1_OT2_F         | CATGGTGAAACCCCAACTCT                                           |
| hCCR5_site1_OT2_R         | CCAAATCCCACACTTTGCTT                                           |
| hCCR5_site1_OT2_Adapter_F | ACACTCTTTCCCTACACGACGCTCTTCCGATCTGCTCAA<br>CTGTATTGAGAGGAAGC   |
| hCCR5_site1_OT2_Adapter_R | GTGACTGGAGTTCAGACGTGTGCTCTTCCGATCTTTCTG<br>GTGGATAAGAAGGAATTT  |
| hCCR5_site2_On_F          | TGAGATGGTGCTTTCATGAAT                                          |
| hCCR5_site2_On_R          | GAAAATGAGAGCTGCAGGTG                                           |
| hCCR5_site2_On_F2         | AAACTTCATTGCTTGGCCAA                                           |
| hCCR5_site2_On_R2         | GAAGATTCCAGAGAAGAAGCC                                          |
| hCCR5_site2_On_Adapter_F  | ACACTCTTTCCCTACACGACGCTCTTCCGATCTCCTGCC<br>AAAAATCAATGTGAAG    |
| hCCR5_site2_On_Adapter_R  | GTGACTGGAGTTCAGACGTGTGCTCTTCCGATCTGAAG<br>GGGACAGTAAGAAGGAA    |
| hCCR5_site2_OT1_F         | GAAAATGGCTGTTGGGTAAATC                                         |
| hCCR5_site2_OT1_R         | TAAGGGCCACAGACATAAAC                                           |
| hCCR5_site2_OT1_Adapter_F | ACACTCTTTCCCTACACGACGCTCTTCCGATCTTCCCTG<br>TCATAAATTTGACGTG    |
| hCCR5_site2_OT1_Adapter_R | GTGACTGGAGTTCAGACGTGTGCTCTTCCGATCTGAAAA<br>AGCAGATCAGAGATGGC   |
| hAAVS1_On_F               | CCTGGTGAACACCTAGGACG                                           |
| hAAVS1_On_R               | CTATGTCCAATTCAGGACAGC                                          |
| hAAVS1_On_Adapter_F       | ACACTCTTTCCCTACACGACGCTCTTCCGATCTCTTCCCT<br>CCCACCCCTG         |
| hAAVS1_On_Adapter_R       | GTGACTGGAGTTCAGACGTGTGCTCTTCCGATCTCCCCA<br>TCCTTAGGCCTCCT      |
| hAAVS1_OT1_F              | AGCAGGTTGGGTATCCTGTG                                           |
| hAAVS1_OT1_R              | AGGCTGTTTCTGCCTCCATA                                           |
| hAAVS1_OT1_Adapter_F      | ACACTCTTTCCCTACACGACGCTCTTCCGATCTCCATCTC<br>CTGGTCTGCACAA      |
| hAAVS1_OT1_Adapter_R      | GTGACTGGAGTTCAGACGTGTGCTCTTCCGATCTCAAAG<br>GGGCTATTCAGATGT     |
| hAAVS1_OT2_F              | ATCCAGGGGGTTGGAATATC                                           |
| hAAVS1_OT2_R              | TGCCTGAGAGCAGGTCTTTT                                           |
| hAAVS1_OT2_Adapter_F      | ACACTCTTTCCCTACACGACGCTCTTCCGATCTGGTTATC<br>TGTTAATGATAGCCTG   |
| hAAVS1_OT2_Adapter_R      | GTGACTGGAGTTCAGACGTGTGCTCTTCCGATCTCACAA<br>GCCATGAAGACTGG      |
| hIL12A-AS1_On_F           | GCTTGCTGTATACACAAGGC                                           |
| hIL12A-AS1_On_R           | CTGATCTTGAGAACAGAAGACC                                         |
| hIL12A-AS1_On_Adapter_F   | ACACTCTTTCCCTACACGACGCTCTTCCGATCTGAAAAG<br>GTGTTGCTTATTGCC     |
| hIL12A-AS1_On_Adapter_R   | GTGACTGGAGTTCAGACGTGTGCTCTTCCGATCTCAGCT<br>CCTTCCATCTGGGTTTC   |
| hIL12A-AS1_OT1_F          | ATTCTGCCTCCTCTCCCACT                                           |
| hIL12A-AS1_OT1_R          | CAGGAGGAGCAAATTCCAGA                                           |
| hIL12A-AS1_OT1_Adapter_F  | ACACTCTTTCCCTACACGACGCTCTTCCGATCTGGTCCT<br>AACAGAGATTTACTTTCTC |
| hIL12A-AS1_OT1_Adapter_R  | GTGACTGGAGTTCAGACGTGTGCTCTTCCGATCTCTCCC<br>TCTCTCCCTTCTCTC     |

|                                     |                                                                                           |
|-------------------------------------|-------------------------------------------------------------------------------------------|
| hIL12A-AS1_OT2_F                    | GCATCAACAAACTGGCTCATT                                                                     |
| hIL12A-AS1_OT2_R                    | CCTTTGGGATGGTGTCTCT                                                                       |
| hIL12A-AS1_OT2_Adapter_F            | ACACTCTTTCCCTACACGACGCTCTTCCGATCTGCCACT<br>GCTAATGTTTAAAATTC                              |
| hIL12A-AS1_OT2_Adapter_R            | GTGACTGGAGTTCAGACGTGTGCTCTTCCGATCTCTTTA<br>GGGCAGCATTTTGTAG                               |
| hFANCF_On_F                         | CACGGATAAAGACGCTGGGA                                                                      |
| hFANCF_On_R                         | CACAGGCTGCTGAGAAACCT                                                                      |
| hFANCF_On_Adapter_F                 | ACACTCTTTCCCTACACGACGCTCTTCCGATCTCACATC<br>CATCGGCGCTTTG                                  |
| hFANCF_On_Adapter_R                 | GTGACTGGAGTTCAGACGTGTGCTCTTCCGATCTGGTG<br>GTAACGAGCTGCATCC                                |
| hFANCF_OT1_F                        | TGGGAGGAAACCCTAAAGAG                                                                      |
| hFANCF_OT1_R                        | TGCAGGCCCAAGTATTTTGA                                                                      |
| hFANCF_OT1_Adapter_F                | ACACTCTTTCCCTACACGACGCTCTTCCGATCTCAGCTG<br>ACTCAGCTGAACTG                                 |
| hFANCF_OT1_Adapter_R                | GTGACTGGAGTTCAGACGTGTGCTCTTCCGATCTGTCTG<br>GTGTGTTATGCCTGT                                |
| IVT_AsCas12a_hDNMT1_site1_sense     | CGAGTAACAGACATGGACCATCAGATCTACAAGAGTAGA<br>AATTACCCTATAGTGAGTCGTATTAATTTTC                |
| IVT_AsCas12a_hDNMT1_site2_sense     | AGCTGAGGCAGGTGCCTGCTGAGCATCTACAAGAGTAG<br>AATTACCCTATAGTGAGTCGTATTAATTTTC                 |
| IVT_AsCas12a_hCCR5_site1_sense      | ATCCATCTTGTTCCACCCTGTGCAATCTACAAGAGTAGAA<br>ATTACCCTATAGTGAGTCGTATTAATTTTC                |
| IVT_AsCas12a_hCCR5_site2_sense      | GAGGATGACCAGCATGTTGCCACATCTACAAGAGTAGA<br>AATTACCCTATAGTGAGTCGTATTAATTTTC                 |
| IVT_AsCas12a_hAAVS1_sense           | GATCCTCTCTGGCTCCATCGTAAGATCTACAAGAGTAGAA<br>ATTACCCTATAGTGAGTCGTATTAATTTTC                |
| IVT_AsCas12a_hIL12A-AS1_sense       | CCCCTTTCCCTTTTAGTGGCATCCATCTACAAGAGTAGAA<br>ATTACCCTATAGTGAGTCGTATTAATTTTC                |
| IVT_AsCas12a_hFANCF_sense           | CTAATCCCGGAACTGGACCCCGCCATCTACAAGAGTAGA<br>AATTACCCTATAGTGAGTCGTATTAATTTTC                |
| IVT_AsCas12a_universal_antisense    | GAAATTAATACGACTCACTATAGGG                                                                 |
| IVT_SpCas9_hDNMT1_site1_sgRNA_sense | GAAATTAATACGACTCACTATAGGAGTGCTAAGGGAACGT<br>TCAGTTTTAGAGCTAGAAATAGCAAG                    |
| IVT_SpCas9_hDNMT1_site2_sgRNA_sense | GAAATTAATACGACTCACTATAGCCAGCAGCCAACCTGAC<br>CAAGTTTTAGAGCTAGAAATAGCAAG                    |
| IVT_SpCas9_hCCR5_site1_sgRNA_sense  | GAAATTAATACGACTCACTATAGTAATAATTGATGTCATAG<br>ATGTTTTAGAGCTAGAAATAGCAAG                    |
| IVT_SpCas9_hCCR5_site2_sgRNA_sense  | GAAATTAATACGACTCACTATAGAACACCAGTGAGTAGAG<br>CGGTTTTAGAGCTAGAAATAGCAAG                     |
| IVT_SpCas9_hAAVS1_sgRNA_sense       | GAAATTAATACGACTCACTATAGGCAAGGAGAGAGATGG<br>CTCCGTTTTAGAGCTAGAAATAGCAAG                    |
| IVT_SpCas9_hIL12A-AS1_sgRNA_sense   | GAAATTAATACGACTCACTATAGTTCTGGGGTCAACATCT<br>TGGGTTTTAGAGCTAGAAATAGCAAG                    |
| IVT_SpCas9_hFANCF_sgRNA_sense       | GAAATTAATACGACTCACTATAGCCGCTCCAGAGCCGTG<br>CGAAGTTTTAGAGCTAGAAATAGCAAG                    |
| IVT_SpCas9_universal_antisense      | AAAAAAGCACCGACTCGGTGCCACTTTTTCAAGTTGATA<br>ACGGACTAGCCTATTTTAACTTGCTATTTCTAGCTCTAAA<br>AC |

† Sequence information of the forward and reverse adapter primers used in targeted amplicon sequencing is shown in green and blue, respectively.

## Supplementary Figures

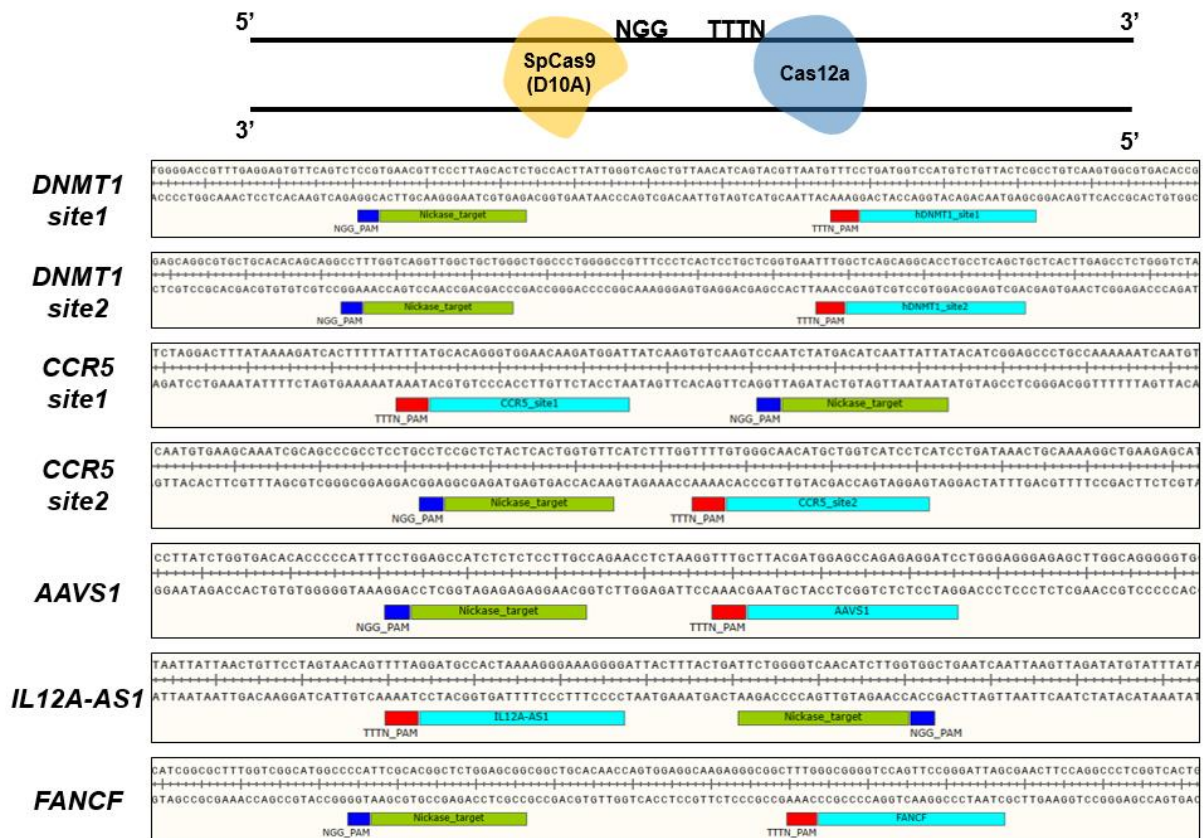

[Figure S1] Schematics of the target sequence for each gene locus which is targeted by Cas12a or SpCas9 nickase in this study. Within each locus (*DNMT1* site1-2, *CCR5* site1-2, *AAVS1*, *IL12A-AS1*, *FANCF*), the targeted sequences either alone or simultaneously by the AsCas12a and SpCas9 (D10A) nickases are displayed in different colors. The protospacer and PAM (TTTN) sequence of the Cas12a is highlighted in cyan and red, respectively. The protospacer and PAM (NGG) sequence of the SpCas9 (D10A) nickase is highlighted in green and blue, respectively.

**A****DNMT1\_site1**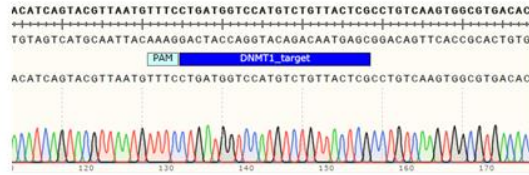**wt-AsCas12a**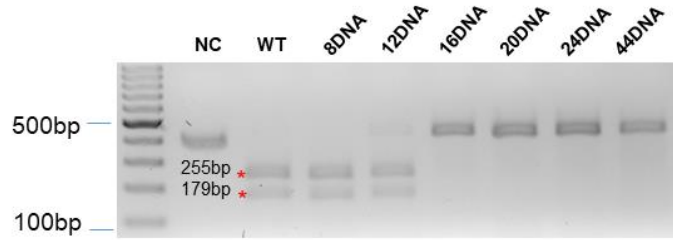**en-AsCas12a**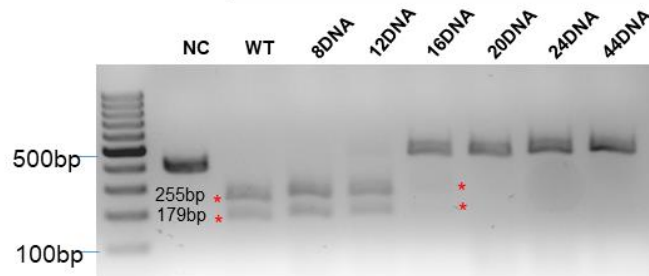**B****CCR5\_site2**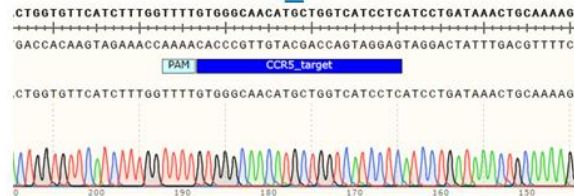**wt-AsCas12a**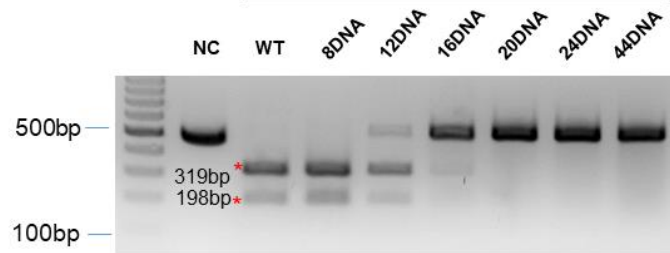**en-AsCas12a**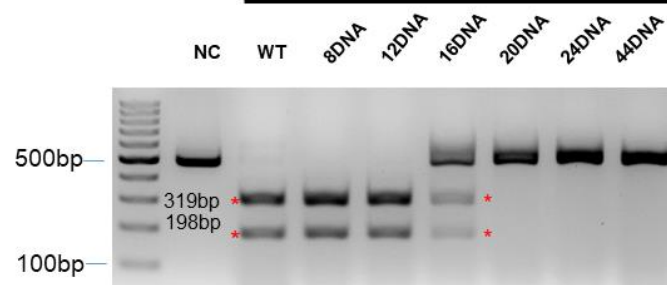



**[Figure S2] Results of the *in-vitro* DNA amplicon cleavage assay to compare the activity of wt- and en-AsCas12a based on a chimeric DNA-RNA guide. (A, B) Results of the Sanger sequencing (upper) and target DNA amplicon cleavage assay (bottom) of *DNMT1*-site1 (A) and *CCR5*-site2 (B) sequences. DNA amplicons for each gene were obtained by PCR using the corresponding DNA primers (Table S3). (NC: negative control, WT: wild-type crRNA, 8-44DNA: chimeric crRNA which has sequential 8 to 44 nt DNA substitution from 3'-end of crRNA). The cleaved amplicons were separated on 2% agarose gel. The protospacer and PAM (TTTN) sequences in a sequencing data are indicated by dark blue and light blue, respectively. Red asterisks on the gel picture indicates a cleaved DNA fragments.**

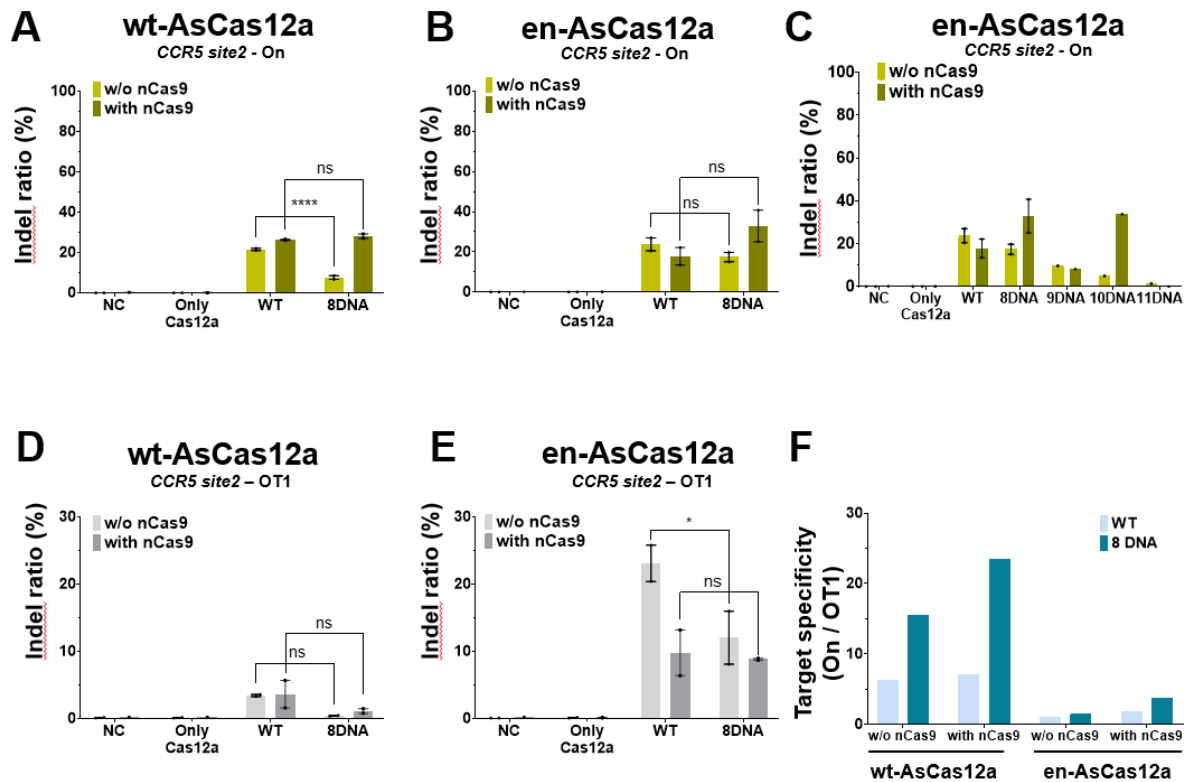

**[Figure S3] Comparison of chimeric DNA-RNA guide-based genome editing efficiency and specificity between wt-Cas12a and en-Cas12a for *CCR5* target sequence. (A, B)** Comparison of indel ratio (%) for the target nucleotide sequence (On, *CCR5*-site2) using wt-Cas12a (A) and en-Cas12a (B) based on a wt- and chimeric guide, respectively. Indel ratio (%) according to the presence (dark green) / absence (pale green) of simultaneous treatment of nCas9 was also compared. **(C)** Analysis of the indel ratio (%) of en-Cas12a according to the increase in the number of DNA substitutions at the 3'-end of the chimeric guide. **(D, E)** Comparison of indel ratio (%) for off-target sequence (OT1) using wt- and chimeric guide-based wt-Cas12a (D) and en-Cas12a (E). **(F)** Comparison of target specificity between wt- and chimeric guide (8DNA) based on wt-Cas12a and en-Cas12a. Histograms are shown as means  $\pm$  s.e.m. from two independent experiments. P-values are calculated using a two-way anova with sidak's multiple comparisons test (ns: not significant, P\*: <0.0332, P\*\*<0.0021, P\*\*\*<0.0002, P\*\*\*\*<0.0001). NC: negative control, only Cas12a: only protein treated, WT: wild-type crRNA was treated with wt- or en-AsCas12a, 8DNA: chimeric crRNA (sequential 8DNA substitution at 3'-end of crRNA) was treated with wt- or en-AsCas12a. nCas9: nickase Cas9 (D10A)).

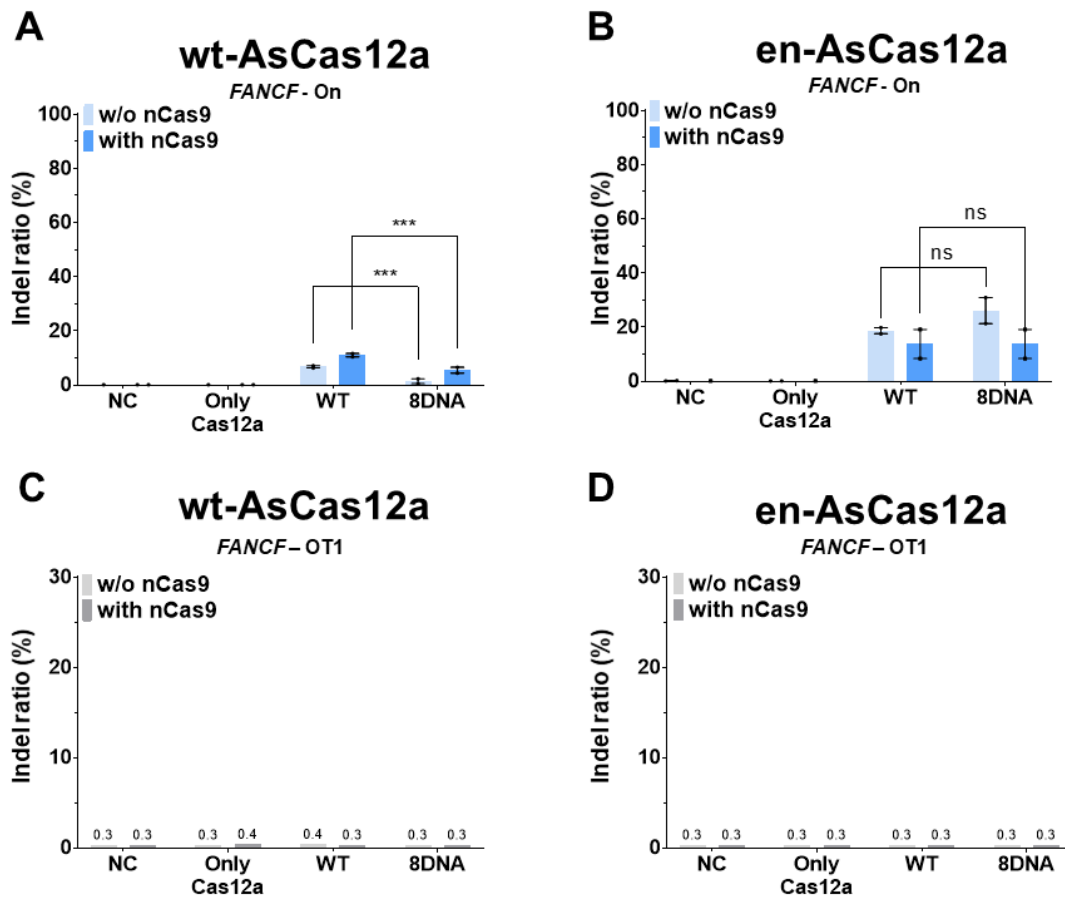

**[Figure S4] Comparison of chimeric DNA-RNA guide-based genome editing efficiency and specificity between wt-Cas12a and en-Cas12a for *FANCF* target sequence. (A, B) Comparison of indel ratio (%) for the target nucleotide sequence (On, *FANCF*) using wt-Cas12a (A) and en-Cas12a (B) based on a wt- and chimeric guide, respectively. Indel ratio (%) according to the presence (blue) / absence (light blue) of simultaneous treatment of nCas9 was also compared. (C, D) Comparison of indel ratio (%) for the off-target sequence (OT1) using wt- and chimeric guide-based wt-Cas12a (C) and en-Cas12a (D). Histograms are shown as means  $\pm$  s.e.m. from two independent experiments. P-values are calculated using a two-way anova with sidak's multiple comparisons test (ns: not significant, P\*: <0.0332, P\*\*: <0.0021, P\*\*\*: <0.0002, P\*\*\*\*: <0.0001). NC: negative control, only Cas12a: only protein treated, WT: wild-type crRNA was treated with wt- or en-AsCas12a, 8DNA: chimeric crRNA (sequential 8DNA substitution at 3'-end of crRNA) was treated with wt- or en-AsCas12a. nCas9: nickase Cas9 (D10A)).**

## AAVS1

|                   | Chromosome | Position  | Bulge | Mismatch No. | Sequence                         |
|-------------------|------------|-----------|-------|--------------|----------------------------------|
| On-target (On)    | Chr19      | 55115578  | 0     | 0            | <u>TTTG</u> CTTACGATGGAGCCAGAG   |
| Off-target1 (OT1) | Chr4       | 95395972  | 0     | 3            | <u>TTTC</u> CTTATGATGAAGCCAGAGAA |
| Off-target1 (OT2) | Chr1       | 182157128 | RNA-1 | 2            | <u>TTTA</u> CTTA-GATGAAGCCACAGAG |

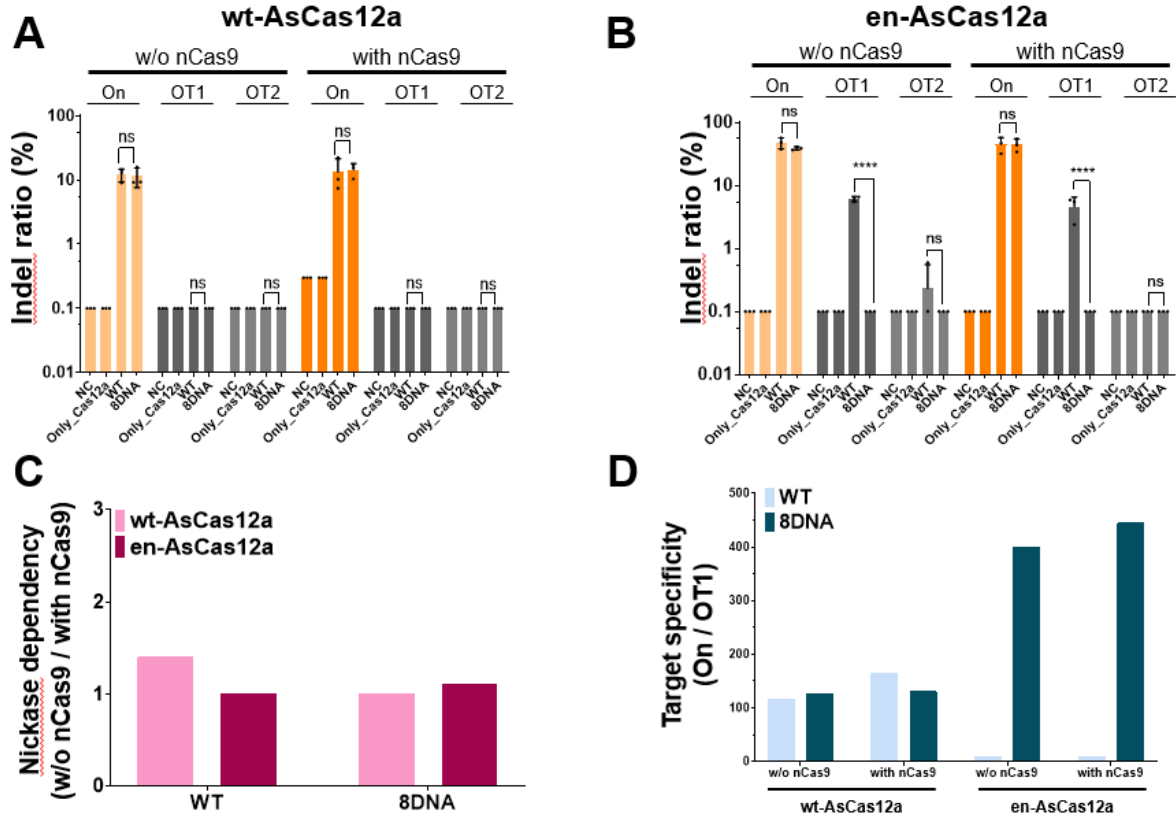

[Figure S5] Comparison of genome editing target specificity (on-target editing (%) / off-target editing (%)) of wt-AsCas12a and en-AsCas12a on endogenous target (*AAVS1*) in human cell line (HEK293FT) using an wt- (WT) or optimized chimeric DNA-RNA guide (8 DNA). Upper table shows the on-target nucleotide sequence (On) for target gene (*AAVS1*) and the corresponding off-target nucleotide sequence (OT1-2) predicted from *in-silico* analysis.<sup>1</sup> The underline indicates the PAM (TTTN) nucleotide sequence, and the nucleotides mismatched with the target sequence in the off-target is indicated in red. (A, B) Indel ratio (%) of the wt-AsCas12a (A) or en-AsCas12a (B) based editing on the endogenous target sequences (on-/off-target sites for *AAVS1*) using wt-crRNA (WT) and 3'-end 8-nt DNA substituted crRNA (8 DNA). NC: negative control, only Cas12a: only protein treated, nCas9: nickase Cas9 (D10A). (C, D) Nickase dependency (C) and target specificity (D) were calculated from NGS results, respectively. Nickase dependency = (without (w/o) nCas9 editing (%) / with (w/) nCas9 editing (%)), Target specificity = (on-target editing (%) / off-target editing (%)). Each histogram is shown as means  $\pm$  s.e.m. from three independent experimental values. *P*-values are calculated using a two-way ANOVA with sidak's multiple comparisons test (ns: not

significant, P\*: <0.0332, P\*\*\*: <0.0021,

P\*\*\*\*: <0.0002, P\*\*\*\*\*: <0.0001).

**DNMT1  
-site2**

|                   | Chromosome | Position  | Mismatch No. | Sequence                                  |
|-------------------|------------|-----------|--------------|-------------------------------------------|
| On-target (On)    | Chr19      | 10133920  | 0            | <u>TTTG</u> GCTCAGCAGGCACCTGCCTC          |
| Off-target1 (OT1) | Chr21      | 25149419  | 2            | <u>CTTA</u> GCTCAGCAGGCACCTGCC <u>CA</u>  |
| Off-target2 (OT2) | Chr12      | 57638266  | 4            | <u>TTTA</u> GCTCAGCTGACACCTGCC <u>CA</u>  |
| Off-target3 (OT3) | Chr6       | 107959600 | 2            | <u>TCCA</u> GCTCAGCAGACAC <u>CA</u> GCCTC |

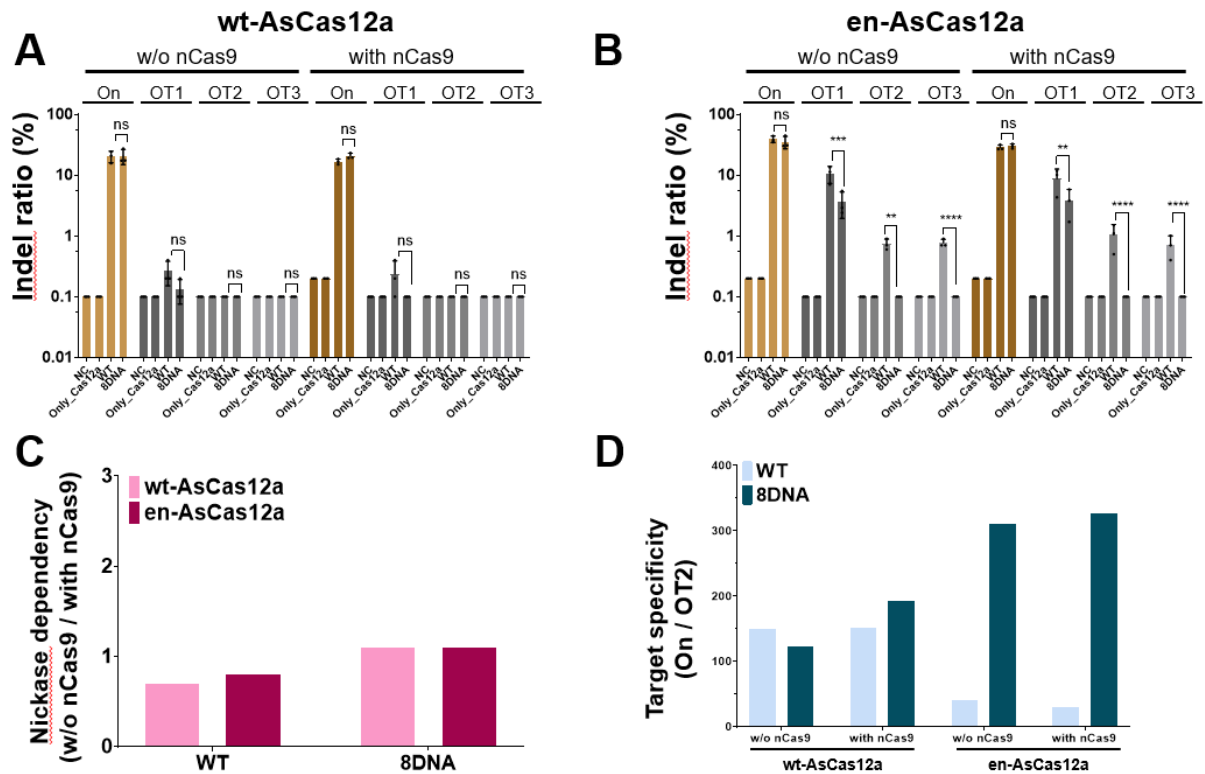

[Figure S6] Comparison of genome editing target specificity (on-target editing (%) / off-target editing (%)) of wt-AsCas12a and en-AsCas12a on endogenous target (*DNMT1*-site2) in human cell line (HEK293FT) using an wt- (WT) or optimized chimeric DNA-RNA guide (8 DNA). Upper table shows the on-target nucleotide sequence (On) for target gene (*DNMT1*-site2) and the corresponding off-target nucleotide sequence (OT1-2) predicted from *in-silico* analysis.<sup>1</sup> The underline indicates the PAM (TTTN) nucleotide sequence, and the nucleotides mismatched with the target sequence in the off-target is indicated in red. (A, B) Indel ratio (%) of the wt-AsCas12a (A) or en-AsCas12a (B) based editing on the endogenous target sequences (on-/off-target sites for *DNMT1*-site2) using wt-crRNA (WT) and 3'-end 8-nt DNA substituted crRNA (8 DNA). NC: negative control, only Cas12a: only protein treated, nCas9: nickase Cas9 (D10A). (C, D) Nickase dependency (C) and target specificity (D) were calculated from NGS results, respectively. Nickase dependency = (without (w/o) nCas9 editing (%) / with (w/) nCas9 editing (%)), Target specificity = (on-target editing (%) / off-target

editing (%)). Each histogram is shown as means  $\pm$  s.e.m. from three independent experimental values. *P*-values are calculated using a two-way ANOVA with sidak's multiple comparisons test (ns: not significant, *P*\*: <0.0332,

*P*\*\*>: <0.0021, *P*\*\*>>: <0.0002, *P*\*\*>>>: <0.0001).

**AAVS1**

|                   | Chromosome | Position  | Bulge   | Mismatch No. | Sequence                         |
|-------------------|------------|-----------|---------|--------------|----------------------------------|
| On-target (On)    | Chr19      | 55115578  | 0       | 0            | <u>TTTG</u> CTTACGATGGAGCCAGAGAG |
| Off-target1 (OT1) | Chr4       | 95395972  | 0       | 3            | <u>TTTC</u> CTTATGATGAAGCCAGAGAA |
| Off-target1 (OT2) | Chr1       | 182157128 | RNA - 1 | 2            | <u>TTTA</u> CTTA-GATGAAGCCACAGAG |

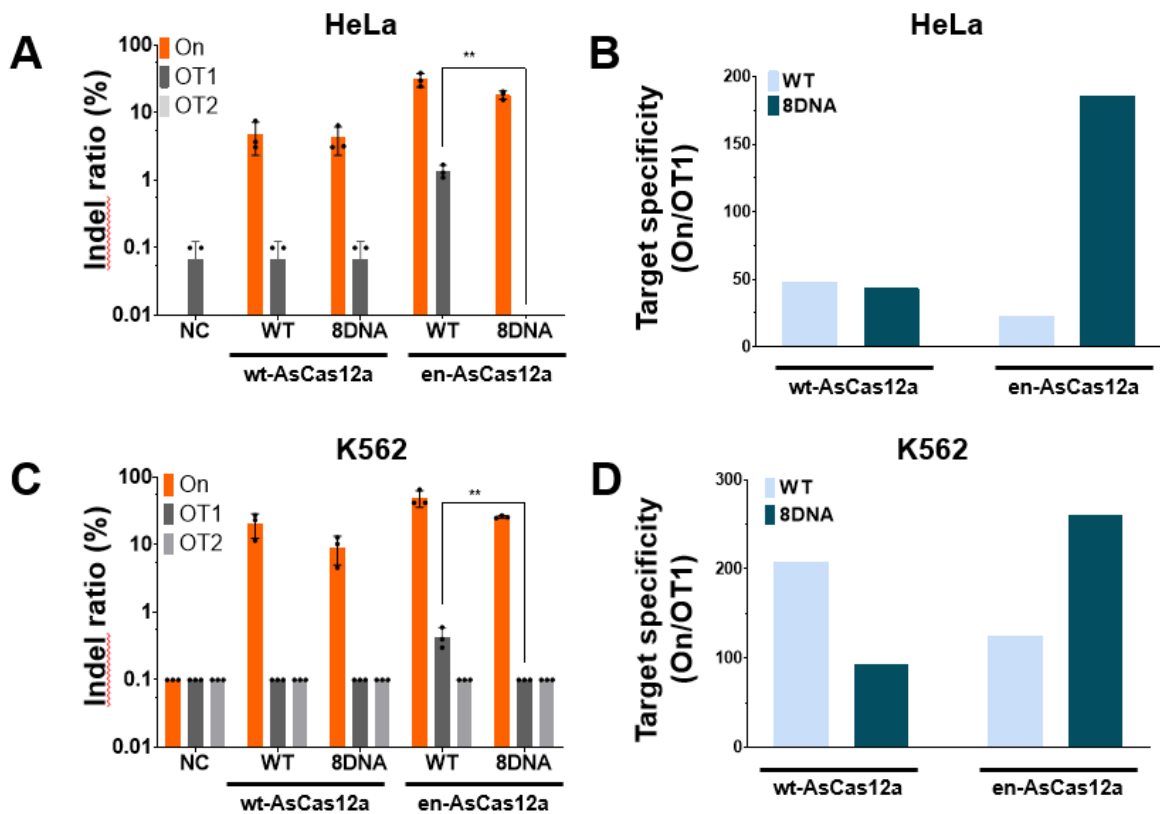

[Figure S7] Comparison of genome editing target specificity (on-target editing (%) / off-target editing (%)) of wt-AsCas12a and en-AsCas12a on endogenous target (*AAVS1*) in human cell lines (HeLa, K562) using an wt- (WT) or optimized chimeric DNA-RNA guide (8 DNA). Upper table shows the on-target nucleotide sequence (On) for target gene (*AAVS1*) and the corresponding off-target nucleotide sequence (OT1-2) predicted from *in-silico* analysis.<sup>1</sup> The underline indicates the PAM (TTTN) nucleotide sequence, and the nucleotides mismatched with the target sequence in the off-target is indicated in red. (A, B) Indel ratio (A) and target specificity (B) of the wt- or en-AsCas12a based editing on target sequences (on-/off-target sites for *AAVS1*) in HeLa cell using wt-crRNA (WT) and 3'-end 8-nt DNA substituted crRNA (8 DNA). (C, D) Indel ratio (C) and target specificity (D) of the wt- or en-AsCas12a

based editing on target sequences (on-/off-target sites for *AAVSI*) in K562 cell using wt-crRNA (WT) and 3'-end 8-nt DNA substituted crRNA (8 DNA). NC: negative control. Target specificity = (on-target editing (%)) / off-target editing (%)). Each histogram is shown as means  $\pm$  s.e.m. from three independent experimental values. *P*-values are calculated using a two-way ANOVA with sidak's multiple comparisons test (ns: not significant, *P*\*: <0.0332, *P*\*\*>: <0.0021, *P*\*\*\*>: <0.0002, *P*\*\*\*\*>: <0.0001).

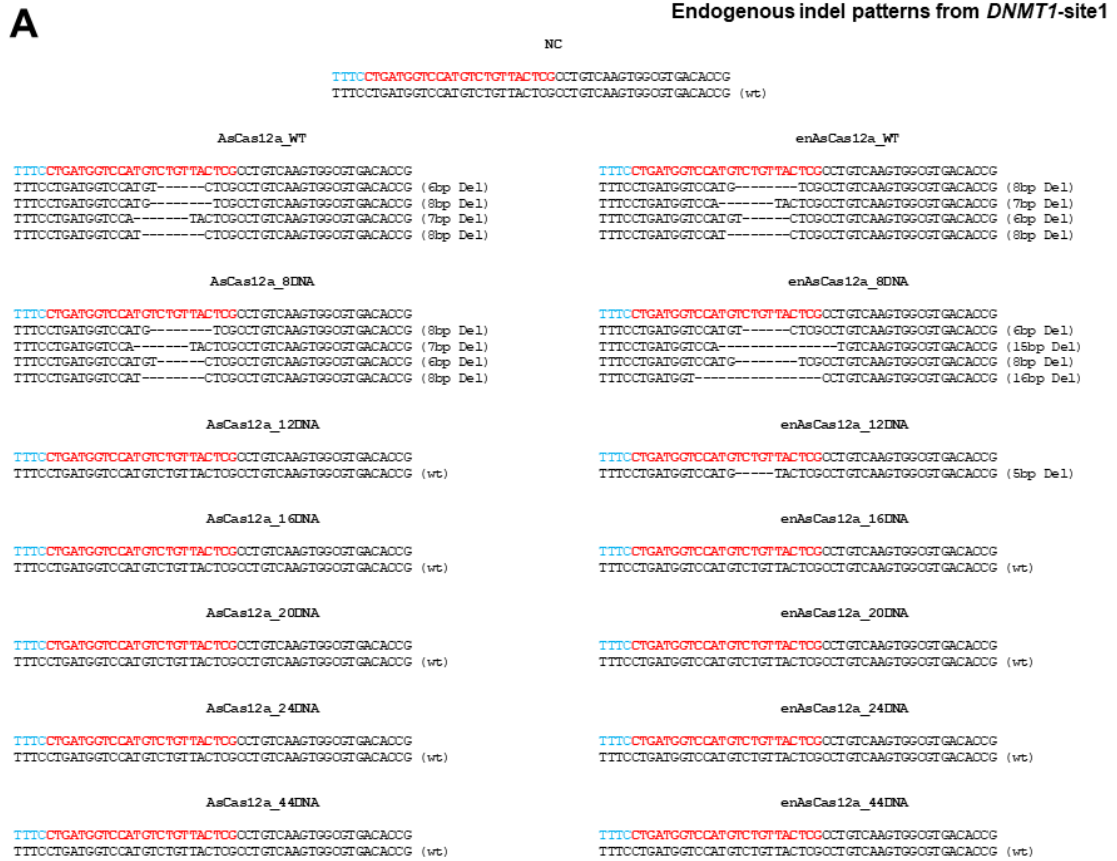

**B****Endogenous indel patterns from CCR5-site2**

NC

TTTA**TGCACAGGGTGGAAACAAGATGGAT**TATCAAGTGTCAAGTCCAATCT  
 TTTATGCACAGGGTGGAAACAAGATGGATTATCAAGTGTCAAGTCCAATCT (wt)

## AsCas12a\_WT

TTTA**TGCACAGGGTGGAAACAAGATGGAT**TATCAAGTGTCAAGTCCAATCT  
 TTTATGCACAGGGTGGAAACAAGATG---TATCAAGTGTCAAGTCCAATCT (3bp Del)

## enAsCas12a\_WT

TTTA**TGCACAGGGTGGAAACAAGATGGAT**TATCAAGTGTCAAGTCCAATCT  
 TTTATGCACAGGGTGGAAAC-----ATATCAAGTGTCAAGTCCAATCT (7bp Del)  
 TTTATGCACAGG-----GTSTCAAGTCCAATCT (22bp Del)  
 TTTATGCACAGGGTGGAAACA-----ATATCAAGTGTCAAGTCCAATCT (6bp Del)  
 TTTATGCACAGGGTGGAAACAATG-----GTSTCAAGTCCAATCT (12bp Del)

## AsCas12a\_8DNA

TTTA**TGCACAGGGTGGAAACAAGATGGAT**TATCAAGTGTCAAGTCCAATCT  
 TTTATGCACAGGGTG-----TTTTTATCAAGTGTCAAGTCCAATCT (8bp Del)

## enAsCas12a\_8DNA

TTTA**TGCACAGGGTGGAAACAAGATGGAT**TATCAAGTGTCAAGTCCAATCT  
 TTTATGCACAGGGTGGAAACA---GGATATCAAGTGTCAAGTCCAATCT (4bp Del)  
 TTTATGCACAGGGTGGAA-----CAAGTGTCAAGTCCAATCT (13bp Del)  
 TTTATGCACAGGGTGGAAAC-----ATATCAAGTGTCAAGTCCAATCT (7bp Del)  
 TTTATGCACAGGGTGGAAACAAG-----TCAAGTGTCAAGTCCAATCT (8bp Del)

## AsCas12a\_12DNA

TTTA**TGCACAGGGTGGAAACAAGATGGAT**TATCAAGTGTCAAGTCCAATCT  
 TTTATGCACAGGGTGGAAACAAGATGGATTATCAAGTGTCAAGTCCAATCT (wt)

## enAsCas12a\_12DNA

TTTA**TGCACAGGGTGGAAACAAGATGGAT**TATCAAGTGTCAAGTCCAATCT  
 TTTATGCACAGGGTGGAAACAAGATGGATTATCAAGTGTCAAGTCCAATCT (wt)

## AsCas12a\_16DNA

TTTA**TGCACAGGGTGGAAACAAGATGGAT**TATCAAGTGTCAAGTCCAATCT  
 TTTATGCACAGGGTGGAAACAAGATGGATTATCAAGTGTCAAGTCCAATCT (wt)

## enAsCas12a\_16DNA

TTTA**TGCACAGGGTGGAAACAAGATGGAT**TATCAAGTGTCAAGTCCAATCT  
 TTTATGCACAGGGTGGAAACAAGATGGATTATCAAGTGTCAAGTCCAATCT (wt)

## AsCas12a\_20DNA

TTTA**TGCACAGGGTGGAAACAAGATGGAT**TATCAAGTGTCAAGTCCAATCT  
 TTTATGCACAGGGTGGAAACAAGATGGATTATCAAGTGTCAAGTCCAATCT (wt)

## enAsCas12a\_20DNA

TTTA**TGCACAGGGTGGAAACAAGATGGAT**TATCAAGTGTCAAGTCCAATCT  
 TTTATGCACAGGGTGGAAACAAGATGGATTATCAAGTGTCAAGTCCAATCT (wt)

## AsCas12a\_24DNA

TTTA**TGCACAGGGTGGAAACAAGATGGAT**TATCAAGTGTCAAGTCCAATCT  
 TTTATGCACAGGGTGGAAACAAGATGGATTATCAAGTGTCAAGTCCAATCT (wt)

## enAsCas12a\_24DNA

TTTA**TGCACAGGGTGGAAACAAGATGGAT**TATCAAGTGTCAAGTCCAATCT  
 TTTATGCACAGGGTGGAAACAAGATGGATTATCAAGTGTCAAGTCCAATCT (wt)

## AsCas12a\_44DNA

TTTA**TGCACAGGGTGGAAACAAGATGGAT**TATCAAGTGTCAAGTCCAATCT  
 TTTATGCACAGGGTGGAAACAAGATGGATTATCAAGTGTCAAGTCCAATCT (wt)

## enAsCas12a\_44DNA

TTTA**TGCACAGGGTGGAAACAAGATGGAT**TATCAAGTGTCAAGTCCAATCT  
 TTTATGCACAGGGTGGAAACAAGATGGATTATCAAGTGTCAAGTCCAATCT (wt)



**C****Endogenous indel patterns from *IL12A-AS1***

NC

TTT**TA**GA**TCC**CAC**TAA**AGGGA**AGGGG**CA**TTACTT**TA**CTG**A**IT**CTG**GGGT**  
 TTTAGGATGCCACTAAAGGGAAAGGGGATTACTTTACTGATTCTGGGGT (wt)

|                                                                                                                                                                                                                                                                                                                                                                                                                                                                                                                                                                                                                                                                                                                                                                                                                                                                                                                                                                                                                                                                                                                                                                                                                                                                                                                                                                                                                                                                                                                                                                                                                                                                                                                                                                                                                                                                                                                                                                                                                                                                    |                                                                                                                                                                                                                                                                                                                                                                                                                                                                                                                                                                                                                                                                                                                                                                                                                                                                                                                                                                                                                                                                                                                                                                                                                                                                                                                                                                                                                                                                                                                                                                                                                                                                                                                                                                                                                                                                                                                                                                                                                                                                   |
|--------------------------------------------------------------------------------------------------------------------------------------------------------------------------------------------------------------------------------------------------------------------------------------------------------------------------------------------------------------------------------------------------------------------------------------------------------------------------------------------------------------------------------------------------------------------------------------------------------------------------------------------------------------------------------------------------------------------------------------------------------------------------------------------------------------------------------------------------------------------------------------------------------------------------------------------------------------------------------------------------------------------------------------------------------------------------------------------------------------------------------------------------------------------------------------------------------------------------------------------------------------------------------------------------------------------------------------------------------------------------------------------------------------------------------------------------------------------------------------------------------------------------------------------------------------------------------------------------------------------------------------------------------------------------------------------------------------------------------------------------------------------------------------------------------------------------------------------------------------------------------------------------------------------------------------------------------------------------------------------------------------------------------------------------------------------|-------------------------------------------------------------------------------------------------------------------------------------------------------------------------------------------------------------------------------------------------------------------------------------------------------------------------------------------------------------------------------------------------------------------------------------------------------------------------------------------------------------------------------------------------------------------------------------------------------------------------------------------------------------------------------------------------------------------------------------------------------------------------------------------------------------------------------------------------------------------------------------------------------------------------------------------------------------------------------------------------------------------------------------------------------------------------------------------------------------------------------------------------------------------------------------------------------------------------------------------------------------------------------------------------------------------------------------------------------------------------------------------------------------------------------------------------------------------------------------------------------------------------------------------------------------------------------------------------------------------------------------------------------------------------------------------------------------------------------------------------------------------------------------------------------------------------------------------------------------------------------------------------------------------------------------------------------------------------------------------------------------------------------------------------------------------|
| <p style="text-align: center;">AsCas12a_WT</p> <p>TTT<b>TA</b>GA<b>TCC</b>CAC<b>TAA</b>AGGGA<b>AGGGG</b>CA<b>TTACTT</b>TA<b>CTG</b>A<b>IT</b>CTG<b>GGGT</b><br/>       TTTAGGATGCCACTAAAGGGG-----GATTACTTTACTGATTCTGGGGT (6bp Del)<br/>       TTTAGGATGCCACTAAAGGGAAAGGG-ATTACTTTACTGATTCTGGGGT (11bp Del)<br/>       TTTAGGATGCCACTAAAGGGGA-----TTACTTTACTGATTCTGGGGT (7bp Del)<br/>       TTTAGGAT-----TACTTTACTGATTCTGGGGT (22bp Del)</p> <p style="text-align: center;">AsCas12a_8DNA</p> <p>TTT<b>TA</b>GA<b>TCC</b>CAC<b>TAA</b>AGGGA<b>AGGGG</b>CA<b>TTACTT</b>TA<b>CTG</b>A<b>IT</b>CTG<b>GGGT</b><br/>       TTTAGGATGCCACTAAAGGGG-----GATTACTTTACTGATTCTGGGGT (6bp Del)<br/>       TTTAGGAT-----TACTGATTCTGGGGT (27bp Del)<br/>       TTTAGGATGCCACTAAAGGGAAAGGG-ATTACTTTACTGATTCTGGGGT (2bp Del)<br/>       TTTAGGATGCCACT-----TTACTGATTCTGGGGT (20bp Del)</p> <p style="text-align: center;">AsCas12a_12DNA</p> <p>TTT<b>TA</b>GA<b>TCC</b>CAC<b>TAA</b>AGGGA<b>AGGGG</b>CA<b>TTACTT</b>TA<b>CTG</b>A<b>IT</b>CTG<b>GGGT</b><br/>       TTTAGGATGCCACTAAAGGGAAAGGGGATTACTTTACTGATTCTGGGGT (wt)</p> <p style="text-align: center;">AsCas12a_16DNA</p> <p>TTT<b>TA</b>GA<b>TCC</b>CAC<b>TAA</b>AGGGA<b>AGGGG</b>CA<b>TTACTT</b>TA<b>CTG</b>A<b>IT</b>CTG<b>GGGT</b><br/>       TTTAGGATGCCACTAAAGGGAAAGGGGATTACTTTACTGATTCTGGGGT (wt)</p> <p style="text-align: center;">AsCas12a_20DNA</p> <p>TTT<b>TA</b>GA<b>TCC</b>CAC<b>TAA</b>AGGGA<b>AGGGG</b>CA<b>TTACTT</b>TA<b>CTG</b>A<b>IT</b>CTG<b>GGGT</b><br/>       TTTAGGATGCCACTAAAGGGAAAGGGGATTACTTTACTGATTCTGGGGT (wt)</p> <p style="text-align: center;">AsCas12a_24DNA</p> <p>TTT<b>TA</b>GA<b>TCC</b>CAC<b>TAA</b>AGGGA<b>AGGGG</b>CA<b>TTACTT</b>TA<b>CTG</b>A<b>IT</b>CTG<b>GGGT</b><br/>       TTTAGGATGCCACTAAAGGGAAAGGGGATTACTTTACTGATTCTGGGGT (wt)</p> <p style="text-align: center;">AsCas12a_44DNA</p> <p>TTT<b>TA</b>GA<b>TCC</b>CAC<b>TAA</b>AGGGA<b>AGGGG</b>CA<b>TTACTT</b>TA<b>CTG</b>A<b>IT</b>CTG<b>GGGT</b><br/>       TTTAGGATGCCACTAAAGGGAAAGGGGATTACTTTACTGATTCTGGGGT (wt)</p> | <p style="text-align: center;">enAsCas12a_WT</p> <p>TTT<b>TA</b>GA<b>TCC</b>CAC<b>TAA</b>AGGGA<b>AGGGG</b>CA<b>TTACTT</b>TA<b>CTG</b>A<b>IT</b>CTG<b>GGGT</b><br/>       TTTAGGATGCCACTAAAGGGG-----GATTACTTTACTGATTCTGGGGT (6bp Del)<br/>       TTTAGGATGCCACTAAAGGGG-----GGATTACTTTACTGATTCTGGGGT (5bp Del)<br/>       TTTAGGATGCCACT-----TTACTTTACTGATTCTGGGGT (15bp Del)<br/>       TTTAGGATGCCACTA-----CTTTACTGATTCTGGGGT (17bp Del)</p> <p style="text-align: center;">enAsCas12a_8DNA</p> <p>TTT<b>TA</b>GA<b>TCC</b>CAC<b>TAA</b>AGGGA<b>AGGGG</b>CA<b>TTACTT</b>TA<b>CTG</b>A<b>IT</b>CTG<b>GGGT</b><br/>       TTTAGGATGCCACTAAAGGGG-----GATTACTTTACTGATTCTGGGGT (6bp Del)<br/>       TTTAGGATGCCACT-----TTACTGATTCTGGGGT (20bp Del)<br/>       TTTAGGAT-----TACTTTACTGATTCTGGGGT (22bp Del)<br/>       TTTAGGATGCCACT-----GATTCTGGGGT (25bp Del)</p> <p style="text-align: center;">enAsCas12a_12DNA</p> <p>TTT<b>TA</b>GA<b>TCC</b>CAC<b>TAA</b>AGGGA<b>AGGGG</b>CA<b>TTACTT</b>TA<b>CTG</b>A<b>IT</b>CTG<b>GGGT</b><br/>       TTTAGGATGCCACTAAAGGGAAAGGGGATTACTTTACTGATTCTGGGGT (wt)</p> <p style="text-align: center;">enAsCas12a_16DNA</p> <p>TTT<b>TA</b>GA<b>TCC</b>CAC<b>TAA</b>AGGGA<b>AGGGG</b>CA<b>TTACTT</b>TA<b>CTG</b>A<b>IT</b>CTG<b>GGGT</b><br/>       TTTAGGATGCCACTAAAGGGAAAGGGGATTACTTTACTGATTCTGGGGT (wt)</p> <p style="text-align: center;">enAsCas12a_20DNA</p> <p>TTT<b>TA</b>GA<b>TCC</b>CAC<b>TAA</b>AGGGA<b>AGGGG</b>CA<b>TTACTT</b>TA<b>CTG</b>A<b>IT</b>CTG<b>GGGT</b><br/>       TTTAGGATGCCACTAAAGGGAAAGGGGATTACTTTACTGATTCTGGGGT (wt)</p> <p style="text-align: center;">enAsCas12a_24DNA</p> <p>TTT<b>TA</b>GA<b>TCC</b>CAC<b>TAA</b>AGGGA<b>AGGGG</b>CA<b>TTACTT</b>TA<b>CTG</b>A<b>IT</b>CTG<b>GGGT</b><br/>       TTTAGGATGCCACTAAAGGGAAAGGGGATTACTTTACTGATTCTGGGGT (wt)</p> <p style="text-align: center;">enAsCas12a_44DNA</p> <p>TTT<b>TA</b>GA<b>TCC</b>CAC<b>TAA</b>AGGGA<b>AGGGG</b>CA<b>TTACTT</b>TA<b>CTG</b>A<b>IT</b>CTG<b>GGGT</b><br/>       TTTAGGATGCCACTAAAGGGAAAGGGGATTACTTTACTGATTCTGGGGT (wt)</p> |
|--------------------------------------------------------------------------------------------------------------------------------------------------------------------------------------------------------------------------------------------------------------------------------------------------------------------------------------------------------------------------------------------------------------------------------------------------------------------------------------------------------------------------------------------------------------------------------------------------------------------------------------------------------------------------------------------------------------------------------------------------------------------------------------------------------------------------------------------------------------------------------------------------------------------------------------------------------------------------------------------------------------------------------------------------------------------------------------------------------------------------------------------------------------------------------------------------------------------------------------------------------------------------------------------------------------------------------------------------------------------------------------------------------------------------------------------------------------------------------------------------------------------------------------------------------------------------------------------------------------------------------------------------------------------------------------------------------------------------------------------------------------------------------------------------------------------------------------------------------------------------------------------------------------------------------------------------------------------------------------------------------------------------------------------------------------------|-------------------------------------------------------------------------------------------------------------------------------------------------------------------------------------------------------------------------------------------------------------------------------------------------------------------------------------------------------------------------------------------------------------------------------------------------------------------------------------------------------------------------------------------------------------------------------------------------------------------------------------------------------------------------------------------------------------------------------------------------------------------------------------------------------------------------------------------------------------------------------------------------------------------------------------------------------------------------------------------------------------------------------------------------------------------------------------------------------------------------------------------------------------------------------------------------------------------------------------------------------------------------------------------------------------------------------------------------------------------------------------------------------------------------------------------------------------------------------------------------------------------------------------------------------------------------------------------------------------------------------------------------------------------------------------------------------------------------------------------------------------------------------------------------------------------------------------------------------------------------------------------------------------------------------------------------------------------------------------------------------------------------------------------------------------------|

**[Figure S8] Representative indel pattern from NGS analysis of endogenous genomic locus edited by wt-Cas12a or en-Cas12a using various chimeric guides. (A-C) List of indel patterns induced by wt-Cas12a, en-Cas12a using various chimeric guides on *DNMT1*-site1 (A), *CCR5*-site2 (B), and *IL12A-AS1* (C) locus in HEK293FT cell line. PAM sequence (TTTN) for AsCas12a is shown in blue and protospacer is shown in red, respectively. The dashed line indicates deleted sequence relative to the wild-type reference sequence. NC: negative control, WT: wild-type crRNA was treated with wt- or en-AsCas12a, 8-44DNA: chimeric crRNA (sequential 8-44DNA substitution at 3'-end of crRNA) was treated with wt- or en-AsCas12a.**





## AsCas12a - Endogenous indel patterns on CCR5 site1 OT2

### AsCas12a\_w/o\_nCas9\_NC

CACAGTGTGTTTATGACAGGGAGAAAAAAGATGAGAGGCCCACTGGCTATCAGATGATAGAGGTAACA  
CACAGTGTGTTTATGACAGGGAGAAAAAAGATGAGAGGCCCACTGGCTATCAGATGATAGAGGTAACA (wt)

### AsCas12a\_w/o\_nCas9\_only\_Cas12a

CACAGTGTGTTTATGACAGGGAGAAAAAAGATGAGAGGCCCACTGGCTATCAGATGATAGAGGTAACA  
CACAGTGTGTTTATGACAGGGAGAAAAAAGATGAGAGGCCCACTGGCTATCAGATGATAGAGGTAACA (wt)

### AsCas12a\_w/o\_nCas9\_WT

CACAGTGTGTTTATGACAGGGAGAAAAAAGATGAGAGGCCCACTGGCTATCAGATGATAGAGGTAACA  
CACAGTGTGTTTATGACAGGGAGAAAAAAGATGAGAGGCCCACTGGCTATCAGATGATAGAGGTAACA (wt)

### AsCas12a\_w/o\_nCas9\_8DNA

CACAGTGTGTTTATGACAGGGAGAAAAAAGATGAGAGGCCCACTGGCTATCAGATGATAGAGGTAACA  
CACAGTGTGTTTATGACAGGGAGAAAAAAGATGAGAGGCCCACTGGCTATCAGATGATAGAGGTAACA (wt)

### AsCas12a\_with\_nCas9\_NC

CACAGTGTGTTTATGACAGGGAGAAAAAAGATGAGAGGCCCACTGGCTATCAGATGATAGAGGTAACA  
CACAGTGTGTTTATGACAGGGAGAAAAAAGATGAGAGGCCCACTGGCTATCAGATGATAGAGGTAACA (wt)

### AsCas12a\_with\_nCas9\_only\_Cas12a

CACAGTGTGTTTATGACAGGGAGAAAAAAGATGAGAGGCCCACTGGCTATCAGATGATAGAGGTAACA  
CACAGTGTGTTTATGACAGGGAGAAAAAAGATGAGAGGCCCACTGGCTATCAGATGATAGAGGTAACA (wt)

### AsCas12a\_with\_nCas9\_WT

CACAGTGTGTTTATGACAGGGAGAAAAAAGATGAGAGGCCCACTGGCTATCAGATGATAGAGGTAACA  
CACAGTGTGTTTATGACAGGGAGAAAAAAGATGAGAGGCCCACTGGCTATCAGATGATAGAGGTAACA (wt)

### AsCas12a\_with\_nCas9\_8DNA

CACAGTGTGTTTATGACAGGGAGAAAAAAGATGAGAGGCCCACTGGCTATCAGATGATAGAGGTAACA  
CACAGTGTGTTTATGACAGGGAGAAAAAAGATGAGAGGCCCACTGGCTATCAGATGATAGAGGTAACA (wt)

## enAsCas12a - Endogenous indel patterns on CCR5 site1 OT2

### enAsCas12a\_w/o\_nCas9\_NC

CACAGTGTGTTTATGACAGGGAGAAAAAAGATGAGAGGCCCACTGGCTATCAGATGATAGAGGTAACA  
CACAGTGTGTTTATGACAGGGAGAAAAAAGATGAGAGGCCCACTGGCTATCAGATGATAGAGGTAACA (wt)

### enAsCas12a\_w/o\_nCas9\_only\_Cas12a

CACAGTGTGTTTATGACAGGGAGAAAAAAGATGAGAGGCCCACTGGCTATCAGATGATAGAGGTAACA  
CACAGTGTGTTTATGACAGGGAGAAAAAAGATGAGAGGCCCACTGGCTATCAGATGATAGAGGTAACA (wt)

### enAsCas12a\_w/o\_nCas9\_WT

CACAGTGTGTTTATGACAGGGAGAAAAAAGATGAGAGGCCCACTGGCTATCAGATGATAGAGGTAACA  
CACAGTGTGTTTATGACAGGGAGAAAAAAGAT--GAGGCCCACTGGCTATCAGATGATAGAGGTAACA (2bp Del)

### enAsCas12a\_w/o\_nCas9\_8DNA

CACAGTGTGTTTATGACAGGGAGAAAAAAGATGAGAGGCCCACTGGCTATCAGATGATAGAGGTAACA  
CACAGTGTGTTTATGACAGGGAGAAAAAAGATGAGAGGCCCACTGGCTATCAGATGATAGAGGTAACA (wt)

### enAsCas12a\_with\_nCas9\_NC

CACAGTGTGTTTATGACAGGGAGAAAAAAGATGAGAGGCCCACTGGCTATCAGATGATAGAGGTAACA  
CACAGTGTGTTTATGACAGGGAGAAAAAAGATGAGAGGCCCACTGGCTATCAGATGATAGAGGTAACA (wt)

### enAsCas12a\_with\_nCas9\_only\_Cas12a

CACAGTGTGTTTATGACAGGGAGAAAAAAGATGAGAGGCCCACTGGCTATCAGATGATAGAGGTAACA  
CACAGTGTGTTTATGACAGGGAGAAAAAAGATGAGAGGCCCACTGGCTATCAGATGATAGAGGTAACA (wt)

### enAsCas12a\_with\_nCas9\_WT

CACAGTGTGTTTATGACAGGGAGAAAAAAGATGAGAGGCCCACTGGCTATCAGATGATAGAGGTAACA  
CACAGTGTGTTTATGACAGGGAGAAAAAAGATGAGAGGCCCACTGGCTATCAGATGATAGAGGTAACA (wt)

### enAsCas12a\_with\_nCas9\_8DNA

CACAGTGTGTTTATGACAGGGAGAAAAAAGATGAGAGGCCCACTGGCTATCAGATGATAGAGGTAACA  
CACAGTGTGTTTATGACAGGGAGAAAAAAGATGAGAGGCCCACTGGCTATCAGATGATAGAGGTAACA (wt)

## B AsCas12a - Endogenous indel patterns from AAVS1 on-target

### AsCas12a\_w/o\_nCas9\_NC

CTCCTTGCCAGAACCTCTAAGGTTTGGCTTACGATGGAGCCAGAGAGGATCCTGGGAGGGAGAGCTTGGCAGG  
CTCCTTGCCAGAACCTCTAAGGTTTGGCTTACGATGGAGCCAGAGAGGATCCTGGGAGGGAGAGCTTGGCAGG (wt)  
AsCas12a\_w/o\_nCas9\_only\_Cas12a

CTCCTTGCCAGAACCTCTAAGGTTTGGCTTACGATGGAGCCAGAGAGGATCCTGGGAGGGAGAGCTTGGCAGG  
CTCCTTGCCAGAACCTCTAAGGTTTGGCTTACGATGGAGCCAGAGAGGATCCTGGGAGGGAGAGCTTGGCAGG (wt)  
AsCas12a\_w/o\_nCas9\_WT

CTCCTTGCCAGAACCTCTAAGGTTTGGCTTACGATGGAGCCAGAGAGGATCCTGGGAGGGAGAGCTTGGCAGG  
CTCCTTGCCAGAACCTCTAAGGTTTGGCTTACGATGGAGCCAGAG--GATCCTGGGAGGGAGAGCTTGGCAGG (2bp Del)  
CTCCTTGCCAGAACCTCTAAGGTTTGGCTTACGATGGAGCCAGAG----TCCTGGGAGGGAGAGCTTGGCAGG (5bp Del)  
CTCCTTGCCAGAACCTCTAAGGTTTGGCTTACGATGGAGCCAGAGAGGAT--GGGAGGGAGAGCTTGGCAGG (3bp Del)  
CTCCTTGCCAGAACCTCTAAGGTTTGGCTTACGATGGAGC-----TTGGCAGG (25bp Del)  
AsCas12a\_w/o\_nCas9\_8DNA

CTCCTTGCCAGAACCTCTAAGGTTTGGCTTACGATGGAGCCAGAGAGGATCCTGGGAGGGAGAGCTTGGCAGG  
CTCCTTGCCAGAACCTCTAAGGTTTGGCTTACGATGGAG-----GGAGAGCTTGGCAGG (19bp Del)  
CTCCTTGCCAGAACCTCTAAGGTTTGGCTTACGATGGAGCCAGAGAG--TCCTGGGAGGGAGAGCTTGGCAGG (2bp Del)  
CTCCTTGCCAGAACCTCTAAGGTTTGGCTTACGATGGAGC-----TTGGCAGG (25bp Del)  
CTCCTTGCCAGAACCTCTAAGGTTTGGCTTACGATGG-----GAGGAGAGCTTGGCAGG (18bp Del)  
AsCas12a\_with\_nCas9\_NC

CTCCTTGCCAGAACCTCTAAGGTTTGGCTTACGATGGAGCCAGAGAGGATCCTGGGAGGGAGAGCTTGGCAGG  
CTCCTTGCCAGAACCTCTAAGGTTTGGCTTACGATGGAGCCAGAGAGGATCCTGGGAGGGAGAGCTTGGCAGG (wt)  
AsCas12a\_with\_nCas9\_only\_Cas12a

CTCCTTGCCAGAACCTCTAAGGTTTGGCTTACGATGGAGCCAGAGAGGATCCTGGGAGGGAGAGCTTGGCAGG  
CTCCTTGCCAGAACCTCTAAGGTTTGGCTTACGATGGAGCCAGAGAGGATCCTGGGAGGGAGAGCTTGGCAGG (wt)  
AsCas12a\_with\_nCas9\_WT

CTCCTTGCCAGAACCTCTAAGGTTTGGCTTACGATGGAGCCAGAGAGGATCCTGGGAGGGAGAGCTTGGCAGG  
CTCCTTGCCAGAACCTCTAAGGTTTGGCTTACGATGGAGCCAGAG----TCCTGGGAGGGAGAGCTTGGCAGG (5bp Del)  
CTCCTTGCCAGAACCTCTAAGGTTTGGCTTACGATGGAGCCAGAG--GATCCTGGGAGGGAGAGCTTGGCAGG (2bp Del)  
CTCCTTGCCAGAACCTCTAAGGTTTGGCTTACGATGGAGCCAG----GATCCTGGGAGGGAGAGCTTGGCAGG (4bp Del)  
CTCCTTGCCAGAACCTCTAAGGTTTGGCTTACGATGGAG-----GGAGGGAGAGCTTGGCAGG (15bp Del)  
AsCas12a\_with\_nCas9\_8DNA

CTCCTTGCCAGAACCTCTAAGGTTTGGCTTACGATGGAGCCAGAGAGGATCCTGGGAGGGAGAGCTTGGCAGG  
CTCCTTGCCAGAACCTCTAAGGTTTGGCTTACGATGGAGCCAGAG--GATCCTGGGAGGGAGAGCTTGGCAGG (2bp Del)  
CTCCTTGCCAGAACCTCTAAGGTTTGGCTTACGATGGAGCCAGAG----TCCTGGGAGGGAGAGCTTGGCAGG (5bp Del)  
CTCCT-----GGGAGGGAGAGCTTGGCAGG (47bp Del)  
CTCCTTGCC-----TGGGAGGGAGAGCTTGGCAGG (42bp Del)

### enAsCas12a - Endogenous indel patterns on AAVS1 on

#### enAsCas12a\_w/o\_nCas9\_NC

CTCCTTGCCAGAACCTCTAAGGTTTGGCTTACGATGGAGCCAGAGAGGATCCTGGGAGGGAGAGCTTGGCAGG  
CTCCTTGCCAGAACCTCTAAGGTTTGGCTTACGATGGAGCCAGAGAGGATCCTGGGAGGGAGAGCTTGGCAGG (wt)  
enAsCas12a\_w/o\_nCas9\_only\_Cas12a

CTCCTTGCCAGAACCTCTAAGGTTTGGCTTACGATGGAGCCAGAGAGGATCCTGGGAGGGAGAGCTTGGCAGG  
CTCCTTGCCAGAACCTCTAAGGTTTGGCTTACGATGGAGCCAGAGAGGATCCTGGGAGGGAGAGCTTGGCAGG (wt)  
enAsCas12a\_w/o\_nCas9\_WT

CTCCTTGCCAGAACCTCTAAGGTTTGGCTTACGATGGAGCCAGAGAGGATCCTGGGAGGGAGAGCTTGGCAGG  
CTCCTTGCCAGAACCTCTAAGGTTTGGCTTACGATGGAG-----GGAGAGCTTGGCAGG (19bp Del)  
CTCCTTGCCAGAACCTCTAAGGTTTGGCTTACGATGGAG-----AGCTTGGCAGG (23bp Del)  
CTCCTTGCCAGAACCTCTAAGGTTTGGCTTACGATGGAGC-----TTGGCAGG (26bp Del)  
CTCCTTGCCAGAACCTCTAAGGTTTGGCTTACGATGGAGCCAG----TCCTGGGAGGGAGAGCTTGGCAGG (5bp Del)

#### enAsCas12a\_w/o\_nCas9\_8DNA

CTCCTTGCCAGAACCTCTAAGGTTTGGCTTACGATGGAGCCAGAGAGGATCCTGGGAGGGAGAGCTTGGCAGG  
CTCCTTGCCAGAACCTCTAAGGTTTGGCTTACGATGGAG-----GGGAGAGCTTGGCAGG (18bp Del)  
CTCCTTGCCAGAACCTCTAAGGTTTGGCTTACGATGGAGC-----TTGGCAGG (25bp Del)  
CTCCTTGCCAGAACCTCTAAGGTTTGGCTTACGATGGAG-----GAGGAGAGCTTGGCAGG (16bp Del)  
CTCCTTGCCAGAACCTCTAAGGTTTGGCTTACGATGG-----GAGGGAGAGCTTGGCAGG (18bp Del)

#### enAsCas12a\_with\_nCas9\_NC

CTCCTTGCCAGAACCTCTAAGGTTTGGCTTACGATGGAGCCAGAGAGGATCCTGGGAGGGAGAGCTTGGCAGG  
CTCCTTGCCAGAACCTCTAAGGTTTGGCTTACGATGGAGCCAGAGAGGATCCTGGGAGGGAGAGCTTGGCAGG (wt)  
enAsCas12a\_with\_nCas9\_only\_Cas12a

CTCCTTGCCAGAACCTCTAAGGTTTGGCTTACGATGGAGCCAGAGAGGATCCTGGGAGGGAGAGCTTGGCAGG  
CTCCTTGCCAGAACCTCTAAGGTTTGGCTTACGATGGAGCCAGAGAGGATCCTGGGAGGGAGAGCTTGGCAGG (wt)  
enAsCas12a\_with\_nCas9\_WT

CTCCTTGCCAGAACCTCTAAGGTTTGGCTTACGATGGAGCCAGAGAGGATCCTGGGAGGGAGAGCTTGGCAGG  
CTCCTTGCCAGAACCTCTAAGGTTTGGCTTACGATGGAGC-----GAGCTTGGCAGG (18bp Del)  
CTC-----TCCTGGGAGGGAGAGCTTGGCAGG (45bp Del)  
CTCCTTGCCAGAACCTCTAAGGTTTGGCTTACGATGGAGC-----GAGAGCTTGGCAGG (19bp Del)  
CTCCTTGCCAGAACCT-----GGGAGGGAGAGCTTGGCAGG (36bp Del)

#### enAsCas12a\_with\_nCas9\_8DNA

CTCCTTGCCAGAACCTCTAAGGTTTGGCTTACGATGGAGCCAGAGAGGATCCTGGGAGGGAGAGCTTGGCAGG  
CTCCTTGCCAGAACCTCTAAGGTTTGGCTTACGATGGAGC-----TTGGCAGG (25bp Del)  
CTCCTTGCCAGAACCTCTAAGGTTTGGCTTACGATGGAG-----GGAGGGAGAGCTTGGCAGG (15bp Del)  
CTCCTTGCCAGAACCTCTAAGGTTTGGCTTACGATGGAGCCAG----GATCCTGGGAGGGAGAGCTTGGCAGG (4bp Del)  
CTCCTTGCCAGAACCTCTAAGGTTTGGCTTACGATGGAGCCAG----TCCTGGGAGGGAGAGCTTGGCAGG (5bp Del)

## AsCas12a - Endogenous indel patterns on AAVS1 OT1

### AsCas12a\_w/o\_nCas9\_NC

AACATAGAAGTTTCCTTATGATGAAGCCAGAGAAGCTGTGCTGCTCTGAAAGCTGCCCATCTGTGTACTC  
AACATAGAAGTTTCCTTATGATGAAGCCAGAGAAGCTGTGCTGCTCTGAAAGCTGCCCATCTGTGTACTC (wt)  
AsCas12a\_w/o\_nCas9\_only\_Cas12a

AACATAGAAGTTTCCTTATGATGAAGCCAGAGAAGCTGTGCTGCTCTGAAAGCTGCCCATCTGTGTACTC  
AACATAGAAGTTTCCTTATGATGAAGCCAGAGAAGCTGTGCTGCTCTGAAAGCTGCCCATCTGTGTACTC (wt)  
AsCas12a\_w/o\_nCas9\_WT

AACATAGAAGTTTCCTTATGATGAAGCCAGAGAAGCTGTGCTGCTCTGAAAGCTGCCCATCTGTGTACTC  
AACATAGAAGTTTCCTTATGATGAAGCCAGAGAAGCTGTGCTGCTCTGAAAGCTGCCCATCTGTGTACTC (wt)  
AsCas12a\_w/o\_nCas9\_8DNA

AACATAGAAGTTTCCTTATGATGAAGCCAGAGAAGCTGTGCTGCTCTGAAAGCTGCCCATCTGTGTACTC  
AACATAGAAGTTTCCTTATGATGAAGCCAGAGAAGCTGTGCTGCTCTGAAAGCTGCCCATCTGTGTACTC (wt)  
AsCas12a\_with\_nCas9\_NC

AACATAGAAGTTTCCTTATGATGAAGCCAGAGAAGCTGTGCTGCTCTGAAAGCTGCCCATCTGTGTACTC  
AACATAGAAGTTTCCTTATGATGAAGCCAGAGAAGCTGTGCTGCTCTGAAAGCTGCCCATCTGTGTACTC (wt)  
AsCas12a\_with\_nCas9\_only\_Cas12a

AACATAGAAGTTTCCTTATGATGAAGCCAGAGAAGCTGTGCTGCTCTGAAAGCTGCCCATCTGTGTACTC  
AACATAGAAGTTTCCTTATGATGAAGCCAGAGAAGCTGTGCTGCTCTGAAAGCTGCCCATCTGTGTACTC (wt)  
AsCas12a\_with\_nCas9\_WT

AACATAGAAGTTTCCTTATGATGAAGCCAGAGAAGCTGTGCTGCTCTGAAAGCTGCCCATCTGTGTACTC  
AACATAGAAGTTTCCTTATGATGAAGCCAGAGAAGCTGTGCTGCTCTGAAAGCTGCCCATCTGTGTACTC (wt)  
AsCas12a\_with\_nCas9\_8DNA

AACATAGAAGTTTCCTTATGATGAAGCCAGAGAAGCTGTGCTGCTCTGAAAGCTGCCCATCTGTGTACTC  
AACATAGAAGTTTCCTTATGATGAAGCCAGAGAAGCTGTGCTGCTCTGAAAGCTGCCCATCTGTGTACTC (wt)

## enAsCas12a - Endogenous indel patterns on AAVS1 OT1

### enAsCas12a\_w/o\_nCas9\_NC

AACATAGAAGTTTCCTTATGATGAAGCCAGAGAAGCTGTGCTGCTCTGAAAGCTGCCCATCTGTGTACTC  
AACATAGAAGTTTCCTTATGATGAAGCCAGAGAAGCTGTGCTGCTCTGAAAGCTGCCCATCTGTGTACTC (wt)  
enAsCas12a\_w/o\_nCas9\_only\_Cas12a

AACATAGAAGTTTCCTTATGATGAAGCCAGAGAAGCTGTGCTGCTCTGAAAGCTGCCCATCTGTGTACTC  
AACATAGAAGTTTCCTTATGATGAAGCCAGAGAAGCTGTGCTGCTCTGAAAGCTGCCCATCTGTGTACTC (wt)  
enAsCas12a\_w/o\_nCas9\_WT

AACATAGAAGTTTCCTTATGATGAAGCCAGAGAAGCTGTGCTGCTCTGAAAGCTGCCCATCTGTGTACTC  
AACATAGAAGTTTCCTTATGATGAAGCC-----AGCTGTGCTGCTCTGAAAGCTGCCCATCTGTGTACTC (5bp Del)  
AACATAGAAGTTTCCTTATGATGAAGCC--AGAAGCTGTGCTGCTCTGAAAGCTGCCCATCTGTGTACTC (2bp Del)  
AACATAGAAGTTTCCTTATGATGAAGCC-----GTGCTGCTCTGAAAGCTGCCCATCTGTGTACTC (8bp Del)  
AACATAGAAGTTTCCTTATGAT-----GAAGCTGTGCTGCTCTGAAAGCTGCCCATCTGTGTACTC (9bp Del)  
enAsCas12a\_w/o\_nCas9\_8DNA

AACATAGAAGTTTCCTTATGATGAAGCCAGAGAAGCTGTGCTGCTCTGAAAGCTGCCCATCTGTGTACTC  
AACATAGAAGTTTCCTTATGATGAAGCCAGAGAAGCTGTGCTGCTCTGAAAGCTGCCCATCTGTGTACTC (wt)  
enAsCas12a\_with\_nCas9\_NC

AACATAGAAGTTTCCTTATGATGAAGCCAGAGAAGCTGTGCTGCTCTGAAAGCTGCCCATCTGTGTACTC  
AACATAGAAGTTTCCTTATGATGAAGCCAGAGAAGCTGTGCTGCTCTGAAAGCTGCCCATCTGTGTACTC (wt)  
enAsCas12a\_with\_nCas9\_only\_Cas12a

AACATAGAAGTTTCCTTATGATGAAGCCAGAGAAGCTGTGCTGCTCTGAAAGCTGCCCATCTGTGTACTC  
AACATAGAAGTTTCCTTATGATGAAGCCAGAGAAGCTGTGCTGCTCTGAAAGCTGCCCATCTGTGTACTC (wt)  
enAsCas12a\_with\_nCas9\_WT

AACATAGAAGTTTCCTTATGATGAAGCCAGAGAAGCTGTGCTGCTCTGAAAGCTGCCCATCTGTGTACTC  
AACATAGAAGTTTCCTTATGATGAAGCCAG-----AGCTGTGCTGCTCTGAAAGCTGCCCATCTGTGTACTC (3bp Del)  
AACATAGAAGTTTCCTTATGATGAAGCCAGAGA-----CCCCATCTGTGTACTC (21bp Del)  
AACATAGAAGTTTCCTTATGATGAAGCC-----AGCTGTGCTGCTCTGAAAGCTGCCCATCTGTGTACTC (5bp Del)  
AACATAGAAGTTTCCTTATGATGAAGCCAG-----TGTGCTGCTCTGAAAGCTGCCCATCTGTGTACTC (6bp Del)  
enAsCas12a\_with\_nCas9\_8DNA

AACATAGAAGTTTCCTTATGATGAAGCCAGAGAAGCTGTGCTGCTCTGAAAGCTGCCCATCTGTGTACTC  
AACATAGAAGTTTCCTTATGATGAAGCCAGAGAAGCTGTGCTGCTCTGAAAGCTGCCCATCTGTGTACTC (wt)











**[Figure S9] Representative indel patterns from NGS analysis of each on-/off-target sites on genomic DNA edited by single or co-transfection of chimeric crRNA guided Cas12a and SpCas9 nickase (D10A).** (A-C) List of indel patterns induced by the combination of Cas12a and SpCas9 nickase (D10A) at each on-/off-target sites of *CCR5*-site1 (A), *AAVS1* (B), and *DNMT1*-site2 (C) locus in HEK293FT cell line. PAM sequences (NGG, TTTN) for SpCas9 and Cas12a effector are shown in orange and blue, and each protospacer region is shown in purple and red color, respectively. The dashed line indicates deleted sequence relative to the wild-type reference sequence. NC: negative control, only Cas12a: only protein treated, WT: wild-type crRNA was treated with wt- or en-AsCas12a, 8DNA: chimeric crRNA (sequential 8DNA substitution at 3'-end of crRNA) was treated with wt- or en-AsCas12a. nCas9: nickase Cas9 (D10A), w/o: without.

# A

## Endogenous indel patterns from AAVS1 on-target (HeLa)

### HeLa\_NC

CTCCTTGCCAGAACCTCTAAGGTTTGCTTACGATGGAGCCAGAGAGGATCCTGGGAGGGAGAGCTTGGCAGG  
CTCCTTGCCAGAACCTCTAAGGTTTGCTTACGATGGAGCCAGAGAGGATCCTGGGAGGGAGAGCTTGGCAGG (wt)

### AsCas12a\_WT

CTCCTTGCCAGAACCTCTAAGGTTTGCTTACGATGGAGCCAGAGAGGATCCTGGGAGGGAGAGCTTGGCAGG  
CTCCTTGCCAGAACCTCTA-----GCTTGGCAGG (43bp Del)  
CTCCTTGCCAGAACCTCTAAGGTTTGCTTACGATG-----AGGGAGAGCTTGGCAGG (20bp Del)  
CTCCTTGCCAGAACCTCTAAGGTTTGCTTACGATGGAG-----GGAGAGCTTGGCAGG (19bp Del)  
CTCCTTGCCAGAACCTCTAAGGTTTGCTTACGATGG-----GAGGGAGAGCTTGGCAGG (18bp Del)

### AsCas12a\_8DNA

CTCCTTGCCAGAACCTCTAAGGTTTGCTTACGATGGAGCCAGAGAGGATCCTGGGAGGGAGAGCTTGGCAGG  
CTCCTTGCCAGAACCTCTAAGGTTTGCTTACGATGGAGCCAG-----TCCTGGGAGGGAGAGCTTGGCAGG (5bp Del)  
CTCCTTGCCAGAACCTCTAAGGTTTGCTT-----GGCAGG (37bp Del)  
CTCCTTGCCAGAACCTCTAAGGTTTGCTTACGATGGAGCCAG--GATCCTGGGAGGGAGAGCTTGGCAGG (2bp Del)  
CTCCTTGCCAGAACCTCTAAGGTTTGCTTACGATG-----AGCTTGGCAGG (26bp Del)

### en-AsCas12a\_WT

CTCCTTGCCAGAACCTCTAAGGTTTGCTTACGATGGAGCCAGAGAGGATCCTGGGAGGGAGAGCTTGGCAGG  
CTCCTTGCCAGAACCTCTAAGGTTTGCTTACGATGGAG-----GGAGAGCTTGGCAGG (19bp Del)  
CTCCTTGCCAGAACCTCTAAGGTTTGCTTACGATGGAGCCAG-----GGAGGGAGAGCTTGGCAGG (11bp Del)  
CTCCTTGCCAGAACCTCTAAGGTTTGCTTACGAT-----TCCTGGGAGGGAGAGCTTGGCAGG (14bp Del)  
CTCCTTGCCAGAACCTCTAAGGTTTGCTTACGATGGAG-----AGCTTGGCAGG (23bp Del)

### en-AsCas12a\_8DNA

CTCCTTGCCAGAACCTCTAAGGTTTGCTTACGATGGAGCCAGAGAGGATCCTGGGAGGGAGAGCTTGGCAGG  
CTCCTTGCCAGAACCTCTAAGGTTTGCTTACGATGGAG-----GGAGAGCTTGGCAGG (19bp Del)  
CTCCTTGCCAGAACCTCTAAGGTTTGCTTACGATGGAGC-----TTGGCAGG (25bp Del)  
CTCCTTGCCAGAACCTCTAAGGTTTGCTTACGATGGAG-----AGCTTGGCAGG (23bp Del)  
CTCCTTGCCAGAACCTCTAAGGTTTGCTTACGATGGA-----CAGG (31bp Del)

## Endogenous indel patterns from AAVS1 OT1 (HeLa)

### HeLa\_NC

AACATAGAAG**TTTCCTTATGATGAAGCCAGAGAAGCTG**TGCTGCTCTGAAAAGCTGCCCATCTGTGTACTC  
AACATAGAAGTTTCCTTATGATGAAGCCAGAGAAGCTGTGCTGCTCTGAAAAGCTGCCCATCTGTGTACTC (wt)

### AsCas12a\_WT

AACATAGAAG**TTTCCTTATGATGAAGCCAGAGAAGCTG**TGCTGCTCTGAAAAGCTGCCCATCTGTGTACTC  
AACATAGAAGTTTCCTTATGATGAAGCCAGAGAAGCTGTGCTGCTCTGAAAAGCTGCCCATCTGTGTACTC (wt)

### AsCas12a\_8DNA

AACATAGAAG**TTTCCTTATGATGAAGCCAGAGAAGCTG**TGCTGCTCTGAAAAGCTGCCCATCTGTGTACTC  
AACATAGAAGTTTCCTTATGATGAAGCCAGAGAAGCTGTGCTGCTCTGAAAAGCTGCCCATCTGTGTACTC (wt)

### en-AsCas12a\_WT

AACATAGAAG**TTTCCTTATGATGAAGCCAGAGAAGCTG**TGCTGCTCTGAAAAGCTGCCCATCTGTGTACTC  
AACATAGAAGTTTCCTTATGAT-----GAAGCTGTGCTGCTCTGAAAAGCTGCCCATCTGTGTACTC (9bp Del)  
AACATAGAAGTTTCCTTATGATGAAGCC--AGAAGCTGTGCTGCTCTGAAAAGCTGCCCATCTGTGTACTC (2bp Del)  
AACATAGAAGTTTCCTTATGAT-----AGCTGTGCTGCTCTGAAAAGCTGCCCATCTGTGTACTC (11bp Del)  
AACATAGAAGTTTCCTTATGA-----GCCCATCTGTGTACTC (33bp Del)

### en-AsCas12a\_8DNA

AACATAGAAG**TTTCCTTATGATGAAGCCAGAGAAGCTG**TGCTGCTCTGAAAAGCTGCCCATCTGTGTACTC  
AACATAGAAGTTTCCTTATGATGAAGCCAGAGAAGCTGTGCTGCTCTGAAAAGCTGCCCATCTGTGTACTC (wt)

## B

## Endogenous indel patterns from AAVS1 on-target (K562)

### K562\_NC

CTCCTTGCCAGAACCTCTAAGG**TTTGCTTACGATGGAGCCAGAGAGGATC**CTGGGAGGGAGAGCTTGGCAGG  
CTCCTTGCCAGAACCTCTAAGGTTTGCTTACGATGGAGCCAGAGGATCCTGGGAGGGAGAGCTTGGCAGG (wt)

### AsCas12a\_WT

CTCCTTGCCAGAACCTCTAAGG**TTTGCTTACGATGGAGCCAGAGAGGATC**CTGGGAGGGAGAGCTTGGCAGG  
CTCCTTGCCAGAACCTCTAAGGTTTGCTTACGATGGAGCCAG---GATCCTGGGAGGGAGAGCTTGGCAGG (4bp Del)  
CTCCTTGCCAGAACCTCTAAGGTTTGCTTACGATGGAGCCAGAG--GGATCCTGGGAGGGAGAGCTTGGCAGG (2bp Del)  
CTCCTTGCCAGAACCTCTAAGGTTTGCTTACGATGGAG-----GGAGAGCTTGGCAGG (19bp Del)  
CTCCTTGCCAGAACCTCTAAGGTTTGCTTACGATGGAG--AGGATCCTGGGAGGGAGAGCTTGGCAGG (2bp Del)

### AsCas12a\_8DNA

CTCCTTGCCAGAACCTCTAAGG**TTTGCTTACGATGGAGCCAGAGAGGATC**CTGGGAGGGAGAGCTTGGCAGG  
CTCCTTGCCAGAACCTCTAAGGTTTGCTTACGATGGAGCCAGAG--GATCCTGGGAGGGAGAGCTTGGCAGG (2bp Del)  
CTCCTTGCCAGAACCTCTAAGGTTTGCTTACGATGGAG-----GGAGAGCTTGGCAGG (19bp Del)  
CTCCTTGCCAGAACCTCTAAGGTTTGCTTACGATGGAGC-----ITGGCAGG (25bp Del)  
CTCCTTGCCAGAACCTCTAAGGTTTGCTTACGATGGAG-----AGCTTGGCAGG (23bp Del)

### en-AsCas12a\_WT

CTCCTTGCCAGAACCTCTAAGG**TTTGCTTACGATGGAGCCAGAGAGGATC**CTGGGAGGGAGAGCTTGGCAGG  
CTCCTTGCCAGAACCTCTAAGGTTTGCTTACGATGGAG-----GGAGAGCTTGGCAGG (19bp Del)  
CTCCTTGCCAGAACCTCTAAGGTTTGCTTACGATGGAGC-----ITGGCAGG (25bp Del)  
CTCCTTGCCAGAACCTCTAAGGTTTGCTTACGATGGAG-----AGCTTGGCAGG (23bp Del)  
CTCCTTGCCAGAACCTCTAAGGTTTGCTTACGATGG-----GAGGGAGAGCTTGGCAGG (18bp Del)

### en-AsCas12a\_8DNA

CTCCTTGCCAGAACCTCTAAGG**TTTGCTTACGATGGAGCCAGAGAGGATC**CTGGGAGGGAGAGCTTGGCAGG  
CTCCTTGCCAGAACCTCTAAGGTTTGCTTACGATGGAG-----GGAGAGCTTGGCAGG (19bp Del)  
CTCCTTGCCAGAACCTCTAAGGTTTGCTTACGATGGAGC-----ITGGCAGG (25bp Del)  
CTCCTTGCCAGAACCTCTAAGGTTTGCTTACGATGGAGCCAGAG--GATCCTGGGAGGGAGAGCTTGGCAGG (2bp Del)  
CTCCTTGCCAGAACCTCTAAGGTTTGCTTACGATGGAG-----AGCTTGGCAGG (23bp Del)

## Endogenous indel patterns from AAVS1 OT1 (K562)

### K562\_NC

```
AACATAGAAGTTTCCTTATGATGAAGCCAGAGAAGCTGTGCTGCTCTGAAAGCTGCCCATCTGTGTACTC  
AACATAGAAGTTTCCTTATGATGAAGCCAGAGAAGCTGTGCTGCTCTGAAAGCTGCCCATCTGTGTACTC (wt)
```

### AsCas12a\_WT

```
AACATAGAAGTTTCCTTATGATGAAGCCAGAGAAGCTGTGCTGCTCTGAAAGCTGCCCATCTGTGTACTC  
AACATAGAAGTTTCCTTATGATGAAGCCAGAGAAGCTGTGCTGCTCTGAAAGCTGCCCATCTGTGTACTC (wt)
```

### AsCas12a\_8DNA

```
AACATAGAAGTTTCCTTATGATGAAGCCAGAGAAGCTGTGCTGCTCTGAAAGCTGCCCATCTGTGTACTC  
AACATAGAAGTTTCCTTATGATGAAGCCAGAGAAGCTGTGCTGCTCTGAAAGCTGCCCATCTGTGTACTC (wt)
```

### en-AsCas12a\_WT

```
AACATAGAAGTTTCCTTATGATGAAGCCAGAGAAGCTGTGCTGCTCTGAAAGCTGCCCATCTGTGTACTC  
AACATAGAAGTTTCCTTATGATGAA-----GCTGCTCTGAAAGCTGCCCATCTGTGTACTC (14bp Del)  
AACATAGAAGTTTCCTTATGATGAA-----GCTCTGAAAGCTGCCCATCTGTGTACTC (17bp Del)  
AACATAGAAGTTTCCTTATGATGAAGCC--AGAAGCTGTGCTGCTCTGAAAGCTGCCCATCTGTGTACTC (2bp Del)  
AACATAGAAGTTTCCTTAIGA-----TGCTGCTCTGAAAGCTGCCCATCTGTGTACTC (17bp Del)
```

### en-AsCas12a\_8DNA

```
AACATAGAAGTTTCCTTATGATGAAGCCAGAGAAGCTGTGCTGCTCTGAAAGCTGCCCATCTGTGTACTC  
AACATAGAAGTTTCCTTATGATGAAGCCAGAGAAGCTGTGCTGCTCTGAAAGCTGCCCATCTGTGTACTC (wt)
```

[Figure S10] Representative indel pattern from NGS analysis of endogenous genomic locus in various cell lines edited by wt-Cas12a or en-Cas12a using chimeric DNA-RNA guide. (A, B) List of indel patterns induced by wt-AsCas12a and en-AsCas12a using wt- or 8 DNA chimeric guide on *AAVS1* locus in HeLa (A) or K562 (B) cell lines. PAM sequence (TTTN) for AsCas12a is shown in blue and protospacer is shown in red, respectively. The dashed line indicates deleted sequence relative to the wild-type reference sequence. NC: negative control, WT: wild-type crRNA was treated with wt- or en-AsCas12a, 8 DNA: chimeric crRNA (sequential 8 DNA substitution at 3'-end of crRNA) was treated with wt- or en-AsCas12a.

## Information of the nucleotide sequence for AsCas12a used in this study

### 1. CMV-wt-AsCas12a

```
ATGACACAGTTCGAGGGCTTTACCAACCTGTATCAGGTGAGCAAGACACTGCGGTTTGAGCTGAT  
CCCACAGGGCAAGACCCTGAAGCACATCCAGGAGCAGGGCTTCATCGAGGAGGACAAGGCCCG  
CAATGATCACTACAAGGAGCTGAAGCCCATCATCGATCGGATCTACAAGACCTATGCCGACCAGT  
GCCTGCAGCTGGTGCAGCTGGATTGGGAGAACCTGAGCGCCGCCATCGACTCCTATAGAAAGGA  
GAAAACCGAGGAGACAAGGAACGCCCTGATCGAGGAGCAGGCCACATATCGCAATGCCATCCAC  
GACTACTTCATCGGCCGACAGACAACCTGACCGATGCCATCAATAAGAGACACGCCGAGATCTA  
CAAGGGCCTGTTCAAGGCCGAGCTGTTAATGGCAAGGTGCTGAAGCAGCTGGGCACCGTGAC
```

CACAACCGAGCACGAGAACGCCCTGCTGCGGAGCTTCGACAAGTTTACAACCTACTTCTCCGGC  
TTTTATGAGAACAGGAAGAACGTGTTTCAGCGCCGAGGATATCAGCACAGCCATCCCACACCCGCAT  
CGTGCAGGACAACCTCCCAAGTTAAGGAGAATTGTACATCTTCACACGCCTGATCACCCGCCG  
TGCCCAGCCTGCGGGAGCACTTTGAGAACGTGAAGAAGGCCATCGGCATCTTCGTGAGCACCTC  
CATCGAGGAGGTGTTTTCTTCCCTTTTTATAACCAGCTGCTGACACAGACCCAGATCGACCTGTA  
TAACCAGCTGCTGGGAGGAATCTCTCGGGAGGCAGGCACCGAGAAGATCAAGGGCCTGAACGA  
GGTGTGAATCTGGCCATCCAGAAGAATGATGAGACAGCCACATCATCGCTCCCTGCCACACA  
GATTCATCCCCCTGTTAAGCAGATCCTGTCCGATAGGAACACCCTGTCTTTCATCCTGGAGGAGT  
TTAAGAGCGACGAGGAAGTGATCCAGTCCTTCTGCAAGTACAAGACTGCTGAGAAACGAGAA  
CGTGTGGAGACAGCCGAGGCCCTGTTAACGAGCTGAACAGCATCGACCTGACACACATCTTC  
ATCAGCCACAAGAAGCTGGAGACAATCAGCAGCGCCCTGTGCGACCACTGGGATACACTGAGGA  
ATGCCCTGTATGAGCGGAGAATCTCCGAGCTGACAGGCAAGATCACCAAGTCTGCCAAGGAGAA  
GGTGCAGCGCAGCCTGAAGCACGAGGATATCAACCTGCAGGAGATCATCTCTGCCGCAGGCAAG  
GAGCTGAGCGAGGCCCTCAAGCAGAAAACCAGCGAGATCCTGTCCCACGCACACGCCGCCCTG  
GATCAGCCACTGCCTACAACCCTGAAGAAGCAGGAGGAGAAGGAGATCCTGAAGTCTCAGCTGG  
ACAGCCTGCTGGGCCTGTACCACCTGCTGGACTGGTTTGCCGTGGATGAGTCCAACGAGGTGGA  
CCCCGAGTTCTTGCCCGGCTGACCGGCATCAAGCTGGAGATGGAGCCTTCTGAGCTTCTAC  
AACAAGGCCAGAAATTATGCCACCAAGAAGCCCTACTCCGTGGAGAAGTTCAAGCTGAACCTTCA  
GATGCCTACACTGGCCTCTGGCTGGGACGTGAATAAGGAGAAGAACAATGGCGCCATCCTGTTT  
GTGAAGAACGGCCTGTACTATCTGGGCATCATGCCAAAGCAGAAGGGCAGGTATAAGGCCCTGA  
GCTTCGAGCCACAGAGAAAACCAGCGAGGGCTTTGATAAGATGACTATGACTACTTCCCTGAT  
GCCGCCAAGATGATCCCAAAGTGACAGACCCAGCTGAAGGCCGTGACAGCCACTTTCAGACCC  
ACACAACCCCATCCTGCTGTCCAACAATTCATCGAGCCTCTGGAGATCACAAAGGAGATCTAC  
GACCTGAACAATCCTGAGAAGGAGCCAAAGAAGTTTCAGACAGCCTACGCCAAGAAAACCGGCG  
ACCAGAAGGGCTACAGAGAGGCCCTGTGCAAGTGGATCGACTTCACAAGGGATTTTCTGTCCAA  
GTATACCAAGACAACCTCTATCGATCTGTCTAGCCTGCGGCCATCCTCTCAGTATAAGGACCTGGG  
CGAGTACTATGCCGAGCTGAATCCCCTGCTGTACCACATCAGCTTCCAGAGAATCGCCGAGAAGG  
AGATCATGGATGCCGTGGAGACAGGCAAGCTGTACCTGTTCCAGATCTATAACAAGGACTTTGCC  
AAGGGCCACCACGGCAAGCCTAATCTGCACACACTGTATTGGACCGGCCTGTTTTCTCCAGAGAA  
CCTGGCCAAGACAAGCATCAAGCTGAATGGCCAGGCCGAGCTGTTCTACCGCCCTAAGTCCAGG  
ATGAAGAGGATGGCACACCCGGCTGGGAGAGAAGATGCTGAACAAGAAGCTGAAGGATCAGAAAA  
CCCCAATCCCCGACACCCTGTACCAGGAGCTGTACGACTATGTGAATCACAGACTGTCCCACGAC  
CTGTCTGATGAGGCCAGGGCCCTGCTGCCAACGTGATCACCAAGGAGGTGTCTCACGAGATCA  
TCAAGGATAGGCGCTTTACCAGCGACAAGTTCTTTTTCCACGTGCCTATCACACTGAACTATCAGG  
CCGCCAATTCCCATCTAAGTTCAACCAGAGGGTGAATGCCTACCTGAAGGAGCACCCCGAGAC  
ACCTATCATCGGCATCGATCGGGGCGAGAGAAACCTGATCTATATCACAGTGATCGACTCCACCG  
GCAAGATCCTGGAGCAGCGGAGCCTGAACACCATCCAGCAGTTTGATTACCAGAAGAAGCTGGA  
CAACAGGGAGAAGGAGAGGGTGGCAGCAAGGCAGGCCTGGTCTGTGGTGGGCACAATCAAGG  
ATCTGAAGCAGGGCTATCTGAGCCAGGTCATCCACGAGATCGTGGACCTGATGATCCACTACCAG  
GCCGTGGTGGTGTGAGAACTGAATTTCCGCTTTAAGAGCAAGAGGACCGGCATCGCCGAGA  
AGGCCGTGTACCAGCAGTTCGAGAAGATGCTGATCGATAAGCTGAATTCCTGGTGTGAAGGA  
CTATCCAGCAGAGAAAGTGGGAGGCGTGTGAACCCATACCAGCTGACAGACCAGTTCACCTCC  
TTTGCCAAGATGGGCACCCAGTCTGGCTTCTGTTTTACGTGCCTGCCCATATACATCTAAGATC  
GATCCCCTGACCGGCTTCGTGGACCCCTTCGTGTGAAAACCATCAAGAATCACGAGAGCCGCA  
AGCACTTCTGGAGGGCTTCGACTTCTGCACTACGACGTGAAAACCGGCGACTTCATCCTGCA  
CTTTAAGATGAACAGAAATCTGTCTTCCAGAGGGGCTGCCCGGCTTTATGCCTGCATGGGATAT  
CGTGTTCGAGAAGAACGAGACACAGTTTGACGCCAAGGGCACCCCTTTCATCGCCGGCAAGAGA  
ATCGTGCCAGTGATCGAGAATCACAGATTCACCGGCAGATACCGGGACCTGTATCCTGCCAACGA  
GCTGATCGCCCTGCTGGAGGAGAAGGGCATCGTGTTTCAGGGATGGCTCCAACATCCTGCCAAG  
CTGCTGGAGAATGACGATTCTCACGCCATCGACACCATGGTGGCCCTGATCCGCAGCGTGTGC  
AGATGCGGAACCTCAATGCCGCCACAGGCGAGGACTATATCAACAGCCCCGTGCGCGATCTGAA  
TGCCGTGTGCTTCGACTCCCGGTTTCAGAACCAGAGTGGCCCATGGACGCCGATGCCAATGGC  
GCCTACCACATCGCCCTGAAGGGCCAGCTGCTGCTGAATCACCTGAAGGAGAGCAAGGATCTGA  
AGCTGCAGAACGGCATCTCAATCAGGACTGGCTGGCCTACATCCAGGAGCTGCGCAACAAAAG  
GCCGGCGGCCACGAAAAAGGCCGGCCAGGCAAAAAAGAAAAAGGGATCTTACCCATACGATGTT

CCAGATTACGCTTATCCCTACGACGTGCCTGATTATGCATACCCATATGATGTCCCCGACTATGCC

Cyon: wt-AsCas12a (WT), Yellow: nucleoplasmin NLS, Green: linker, Gray: HA-tag

## 2. pET28-wt-AsCas12a

CATCATCATCATCATCATGTGTACCCCTACGACGTGCCCGACTACGCCGAATTGCCTCCAAAAAAG  
AAGAGAAAGGTAATGACACAGTTTGAAGGCTTACCAATCTCTACCAGGTCAGCAAGACGCTACG  
TTTTGAGCTTATCCCGCAGGGAAAAACCCTGAAACACATTCAGGAACAGGGGTTTCATAGAGGAAG  
ATAAGGCGCGTAACGACCATTATAAAGAACTGAAGCCTATAATCGACCGTATTTATAAAACGTACGC  
GGATCAGTGCCTGCAGCTGGTTCAGCTGGATTGGGAGAATCTGTCCGCGGCTATTGATAGCTATC  
GCAAAGAGAAGACCGAGGAAACCCGTAACGCACTGATTGAAGAGCAGGCGACCTATCGGAATGC  
GATCCATGATTACTTCATCGGCCGCACCGACAACCTGACCGATGCAATTAACAAACGTCACGCAG  
AGATTTACAAAGGTCTGTTTAAAGCAGAGTTATTCAATGGCAAGGTTCTGAAACAGCTGGGTACGG  
TCACCACCACCGAACACGAAAACGCACTGCTGAGGAGCTTTGATAAATTTACCACATATTTTCAGCG  
GTTTCTATGAAAATCGTAAGAATGATTTAGCGCCGAAGATATTTCCACCGCAATTCCTCATCGTATT  
GTGCAGGATAATTTCCGAAGTTTAAAGAAAATTGTCATATTTTACCCGTCTGATCACCGCGGTAC  
CGAGCCTGCGAGAGCATTTTGAAAACGTTAAGAAAGCCATTGGAATTTTGTGAGTACCAGCATTG  
AAGAAGTGTTCGTTCCCGTTCTATAACCAACTGCTGACCCAGACCCAGATTGATCTGTACAATC  
AGCTGCTGGGGGGCATAAGCCGCGAGGCAGGTACCGAAAAGATAAAGGGACTCAATGAGGTGCT  
GAATCTGGCAATTCAGAAGAATGATGAgACGGCTCATATCATTGCTAGCCTGCCGCATCGTTTCATT  
CCCCTGTTTAAAGCAATCCTGAGCGATCGCAATACACTGAGCTTTATCCTCGAAGAGTTTAAATCG  
GACGAAGAAGTTATCCAGAGCTTTTGCAAATACAAAACCCTGCTGCGGAACGAAAATGTGCTGGA  
GACCGCTGAAGCACTGTTTAACTGAACTGAACTCGATCGACCTCACCCATATTTTATATCCACAAA  
AACTGGAAACCATAAGCAGCGCTCTGTGTGACCATTGGGATACCCTGCGCAACGCCCTGTATGA  
ACGGCGTATCAGCGAGCTGACCGGGAAAATCACCAAATCCGCAAAGGAAAAAGTTCAGCGTAGT  
CTGAAACACGAGGACATCAACCTGCAAGAAATATTAGCGCAGCAGGTAAAGAGCTGAGCGAAGC  
ATTCAAACAGAAAACCAGCGAAAATCCTGAGCCATGCCATGCTGCACTGGATCAGCCGCTGCCG  
ACCACCCTGAAAAAACAGGAGGAAAAGGAGATTCTGAAAAGCCAACTGGACAGCCTGCTGGGCC  
TGATCACCTGCTGGACTGGTTTGCAGTCGATGAGAGCAACGAGGTTGATCCTGAGTTCTCCGCT  
CGTCTGACCGGAATCAAGCTGGAGATGGAACCGAGTCTGTGTTTTACAATAAAGCGCGTAATTA  
CGCGACCAAGAAACCGTATAGCGTGGAAAATTCAAACCTGAACTTTTACGATGCCGACCCTTGCAA  
GCGGATGGGACGTTAACAAGAAAAAACAATGGGGCAATTCTGTTTGTGAAAATGGCCTCTATT  
ATCTGGGTATCATGCCGAAACAGAAAGGGCGCTACAAAGCCCTGTCATTTGAGCCGACCGAGAAA  
ACCTCAGAGGGTTTCGACAAGATGTACTACGATTATTTCCCGGATGCGGCAAAAATGATACCCAAA  
TGTAGCACCCAACCTGAAGGCAGTTACAGCCCACTTTAGACCCATACACCCCGATCCTGCTGTC  
GAACAATTTTATAGAGCCGCTGGAAATTACCAAAGAGATTTATGATCTGAATAATCCGGAAAAGGAG  
CCCAAGAAATTTAGACGGCGTATGCAAAAAGACCGGGGATCAGAAAGGTTATCGTGAAGCGCT  
GTGCAATGGATTGACTTTACCCGTGACTTTCTGTCAAAAATATACCAAACGACGAGCATTGATCT  
GAGCAGCCTACGTCGAGCAGCCAATATAAGGATCTGGGCGAATATTACGCCGAACTGAATCCGC  
TGCTCTACCATATTTCTTCCAACGAATCGCTGAAAAAGAAATAATGGACGCCGTTGAAACCGGCA  
AACTGTATCTGTTTCAAATCTACAACAAAGATTTCCGCAAAGGCCATCACGGTAAGCCGAACCTGC  
ATACCCTGTATTGGACCGGTCTGTTTAGCCCGGAGAATCTGGCCAAAACCAGCATCAAGCTGAAC  
GGACAGGCAGAACTGTTTTACCGCCCCAAAAGCCGATGAAAAGGATGGCACACCGCCTGGGCC  
AAAAAATGCTGAATAAGAACTCAAAGATCAGAAAACGCCGATACCGGATACCCCTTTATCAGGAGC  
TGATGATTATGTTAACCACCGGCTGAGCCATGACCTGAGCGACGAAGCGCGTGCCTGCTGCC  
GAACGTGATTACCAAGGAAGTCTCGCATGAAATTATTAAGATCGGCGCTTACCAGTGATAAATTT  
TTCTTCCATGTACCGATCACCTGAATTATCAAGCCGCAATAGCCCTTCAAATTTAATCAACGCG  
TGAATGCGTACCTGAAAGAGCATCCGGAGACCCCAATTATTGGCATAGACCGAGGAGAACGCAAT  
CTCATTATATCACCGTCATTGATAGCACCGGTAAGATCCTGGAACAGCGTAGCCTGAATACCATT  
AGCAGTTTGACTACCAGAAAAAGCTGGACAACAGAGAAAAGGAACGTGTAGCCGCCCGGCAGGC  
TTGGAGTGTGGTGGTACTATCAAGGATCTGAAGCAGGGGTATCTCTCCAAGTTATCCATGAAAT  
TGTCGATCTAATGATTCACTATCAAGCAGTAGTGGTACTGGAAAATCTGAATTTCCGTTTCAAAGC  
AAACGTACAGGGATCGCTGAAAAGCCGTTTATCAGCAGTTCGAGAAAATGCTGATAGACAAGCT



GAATTGCCTGGTTCTGAAAGATTATCCGGCAGAGAAGGTGGGCGGTGTGCTGAACCCGTACCAG  
CTGACTGATCAATTTACGAGCTTTGCAAAAATGGGAACGCAGAGCGGTTTCCTGTTCTATGTTCCG  
GCGCCATATACCAGCAAGATAGACCCGCTGACAGGTTTTCGTAGATCCGTTTGTCTGGAAAACCAT  
AAAAATCATGAAAGTCGCAAACATTTTCTGGAGGGCTTTGATTTTCTGCACTATGACGTGAAAACC  
GGCGACTTCATTCTGCATTTTAAAATGAACCGTAATCTGTCCTTTACGCGCGGCCTGCCTGGCTTT  
ATGCCGCGCTGGGACATTGTTTTGAAAAGAATGAGACACAGTTTGATGCCAAAGGTACCCCTT  
TATTGCGGGGAAACGCATTGTGCCCGTTATAGAAAATCACCGCTTACCCGGACGGTATAGGGACT  
TGATCCCGGCAAATGAATTGATAGCGCTGCTGGAGGAGAAAGGTATTGTCTTTCCGGGATGGATCA  
AACATCCTGCCGAAGCTGCTGGAGAACGATGACAGCCACGCAATAGACACCATGGTAGCGCTGA  
TCCGAAGCGTGCTGCAGATGCGTAACAGTAATGCGGCTACGGGGGAAGACTACATTAATAGCCCG  
GTCCGTGATCTGAACGGCGTTTGTTCGATAGCAGATTTCAAATCCGGAGTGGCCGATGGATGC  
CGATGCCAATGGAGCTTACCATATCGCTCTCAAAGGTCAGCTCCTACTGAACCATTTGAAAGAATC  
AAAAGATCTGAAACTGCAGAACGGCATCTCGAATCAGGACTGGCTGGCCTACATTCAAGAACTGA  
GAAACGACTACAAAGACCATGACGGTGATTATAAAGATCATGACATCGATTACAAGGATGACGATG  
ACAAG

Green: 6His-tag, Magenta: HA-tag, Yellow: SV40 NLS, Cyan: enAsCas12a (WT), Gray: 3X FLAG

## Information of the amino acid sequence for AsCas12a used in this study

### 3. CMV-wt-AsCas12a

MTQFEGFTNLYQVSKTLRFELIPQGKTLKHIQEQGFIEEDKARNNDHYKELKPIIDRIYKTYADQCLQLVQ  
LDWENLSAIDSYRKEKTEETRNALIEEQATYRNAIHDFIGRTDNLTDANKRHAIEYKGLFKAELFNG  
KVLKQLGTVTTTEHENALLRSFDKFTTYFSGFYENRKNVFS AEDISTAIPHRIVQDNFPKFKENCHIFTR  
LITAVPSLREHFENVKKAIGIFVSTSIEEVFSFPFYNQLLTQTQIDLYNQLLGGISREAGTEKIKGLNEVLN  
LAIQKNDETAHIIASLPHRFIPLFKQILSDRNTLSFILEEFKSDEEVIQSFCKYKTLRNENVLETAELFN  
ELNSIDLTHIFISHKKLETISSALCDHWDTLRNALYERRISELTGKITKSAKEKVQRSLKHEDINLQEIIA  
GKELSEAFKQKTSEILSHAHAALDQPLPTTLKKQEEKEILKSQLD SLLGLYHLLDWFVAVDESNEVDPEF  
SARLTGIKLEMPSLSFYNKARNYATKKPYSVEKFKLNFQMPTLASGWDVNKEKNGAILFVKNGLYY  
LGIMPKQKGRYKALSFEPTSEKTFSEGFDMYYDYFPDAAKMIPKCSTQLKAVTAHFQTHHTPILLSNNFI  
EPLITKEIYDLNPEKEPKFKQAYAKKTGDQKGYREALCKWIDFTRDFLSKYTKTTSIDLSSLRPSSQ  
YKDLGEYYAELNPLLYHISFQRIAEKEIMDAVETGKLYLFIYNKDFAKGHHGKPNLHLYWTGLFSPE  
NLAKTSIKLNGQAELFYRPKSRMKRMAHRLGEKMLNKKLKDQKTPIPDTLYQELYDVNHRLSHDLS  
EARALLPNVITKEVSHEIIKDRRFTSDKFFFHVPITLNYQAANSPSKFNQRVNAYLKEHPETPIIGIDRGE  
RNLIIYITVIDSTGKILEQRSLNTIQQFDYQKLDNREKERVAARQAWSVVGTIKDLKQGYLSQVIHEIVD  
LMIHYQAVVVLENLNFQKSKRTGIAEKAVYQQFEKMLIDKLNCLVLKDYPAEKVGGLNPNYQLTDQFT  
SFAKMGTSQSGFLFYVPAPYTSKIDPLTGFVDPFVWKTIKNHE SRKHFLEGFDFLHYDVKTGDFILHFK  
MNRNLSFQRGLPGFMPAWDIVFEKNETQFDAQGTPFIAGKRIVPVENHRFTGRYRDLYPANELIALLE  
EKGIVFRDGSNILPKLENDSDHAIDTMVALIRSVLQMRNSNAATGEDYINSPVRDLNGVCFDSRFQN  
PEWPMDADANGAYHIALKGQLLNHLKESKDLKLQNGISNQDWLAIQELRNKRPAATKKAGQAKKK  
KGSYPYDVPDYAYPYDVPDYAYPYDVPDYA

### 4. pET28-wt-AsCas12a

HHHHHVPYDVPDYAELPKKKRKMVMTQFEGFTNLYQVSKTLRFELIPQGKTLKHIQEQGFIEEDKA  
RNDHYKELKPIIDRIYKTYADQCLQLVQLDWENLSAIDSYRKEKTEETRNALIEEQATYRNAIHDFIG  
RTDNLTDANKRHAIEYKGLFKAELFNGKVLKQLGTVTTTEHENALLRSFDKFTTYFSGFYENRKNVFS  
AEDISTAIPHRIVQDNFPKFKENCHIFTRLITAVPSLREHFENVKKAIGIFVSTSIEEVFSFPFYNQLLTQT  
QIDLYNQLLGGISREAGTEKIKGLNEVLNLAIQKNDETAHIIASLPHRFIPLFKQILSDRNTLSFILEEFKS  
DEEVIQSFCKYKTLRNENVLETAELFNELNSIDLTHIFISHKKLETISSALCDHWDTLRNALYERRISELT  
GKITKSAKEKVQRSLKHEDINLQEIIAAGKELSEAFKQKTSEILSHAHAALDQPLPTTLKKQEEKEILKS  
QLD SLLGLYHLLDWFVAVDESNEVDPEFSARLTGIKLEMPSLSFYNKARNYATKKPYSVEKFKLNFQM  
PTLASGWDVNKEKNGAILFVKNGLYYLGIMPKQKGRYKALSFEPTSEKTFSEGFDMYYDYFPDAAKM  
IPKCSTQLKAVTAHFQTHHTPILLSNNFIEPLITKEIYDLNPEKEPKFKQAYAKKTGDQKGYREALCK

WIDFTRDFLSKYTKTTSIDLSSLRPSSQYKDLGEYYAELNPLLYHISFQRIAEKEIMDAVETGKLYLFQIY  
NKDFAKGHHGKPNLHTLYWTGLFSPENLAKTSIKLNGQAELFYRPKSRMKRMAHRLGEKMLNKKLKD  
QKTRIPDTLYQELYDYVNHRLSHDLSDEARALLPNVITKEVSHEIIKDRRFTSDKFFFHVPITLNYQAAN  
SPSKFNQRVNAYLKEHPETPIIGIDRGERNLIYITVIDSTGKILEQRSLNTIQQFDYQKKLDNREKERVAA  
RQAWSVVGTIKDLKQGYLSQVIHEIVDLMIHQAVVLENLNFQFKSKRTGIAEKAVYQQFEKMLIDKL  
NCLVLKDYPAEKVGGVLNPYQLTDQFTSFAKMGTQSGFLFYVPAPYTSKIDPLTGFVDPFVWKTIKNH  
ESRKHFLLEGDFDLHYDVKTGDFILHFKMNRNLSFQRGLPGFMPAWDIVFEKNETQFDAKGT PFIAGKR  
IVPIENHRFTGRYRDLYPANELIALLEEKGIVFRDGSNILPKLENDSDHAIDTMVALIRSVLQMRNSNA  
ATGEDYINSPVRDLNGVCFDSRFQNPPEWPMADANGAYHIALKGQLLNHLKESKDLKLQNGISNQD  
WLAYIQELRNDYKDHDGDYKDHDIDYKDDDDK

## Information of the nucleotide sequence for en-AsCas12a used in this study

### 5. CMV-en-AsCas12a

ATGACACAGTTCGAGGGCTTTACCAACCTGTATCAGGTGAGCAAGACACTGCGGTTTGAGCTGAT  
CCCACAGGGCAAGACCCTGAAGCACATCCAGGAGCAGGGCTTCATCGAGGAGGACAAGGCCCG  
CAATGATCACTACAAGGAGCTGAAGCCCATCATCGATCGGATCTACAAGACCTATGCCGACCAGT  
GCCTGCAGCTGGTGCAGCTGGATTGGGAGAACCTGAGCGCCGCCATCGACTCCTATAGAAAGGA  
GAAAACCGAGGAGACAAGGAACGCCCTGATCGAGGAGCAGGCCACATATCGCAATGCCATCCAC  
GACTACTTCATCGGCCGACAGACAACCTGACCGATGCCATCAATAAGAGACACGCCGAGATCTA  
CAAGGGCCTGTTCAAGGCCGAGCTGTTAATGGCAAGGTGCTGAAGCAGCTGGGCACCGTGAC  
CACAACCGAGCACGAGAACGCCCTGCTGCGGAGCTTCGACAAGTTTACAACCTACTTCTCCGGC  
TTTTATAGGAACAGGAAGAACGTGTTTCAGCGCCGAGGATATCAGCACAGCCATCCCACACCGCAT  
CGTGCAGGACAACCTCCCAAGTTAAGGAGAATTGTCACATCTTCACACGCCTGATCACCGCCG  
TGCCCAGCCTGCGGGAGCACTTTGAGAACGTGAAGAAGGCCATCGGCATCTTCGTGAGCACCTC  
CATCGAGGAGGTGTTTTCCCTTTTATAACCAGCTGCTGACACAGACCCAGATCGACCTGTA  
TAACCAGCTGCTGGGAGGAATCTCTCGGGAGGCAGGCACCGAGAAGATCAAGGGCCTGAACGA  
GGTGTGAATCTGGCCATCCAGAAGAATGATGAGACAGCCACATCATCGCTCCCTGCCACACA  
GATTCATCCCCCTGTTAAGCAGATCCTGTCCGATAGGAACACCCTGTCTTTCATCCTGGAGGAGT  
TTAAGAGCGACGAGGAAGTGATCCAGTCCTTCTGCAAGTACAAGACACTGCTGAGAAACGAGAA  
CGTGTGGAGACAGCCGAGGCCCTGTTAACGAGCTGAACAGCATCGACCTGACACACATCTTC  
ATCAGCCACAAGAAGCTGGAGACAATCAGCAGCGCCCTGTGCGACCACTGGGATACACTGAGGA  
ATGCCCTGTATGAGCGGAGAATCTCCGAGCTGACAGGCAAGATCACCAAGTCTGCCAAGGAGAA  
GGTGCAGCGCAGCCTGAAGCACGAGGATATCAACCTGCAGGAGATCATCTCTGCCGCAGGCAAG  
GAGCTGAGCGAGGCCTTCAAGCAGAAAACCAGCGAGATCCTGTCCCACGCACACGCCGCCCTG  
GATCAGCCACTGCCTACAACCCTGAAGAAGCAGGAGGAGAAGGAGATCCTGAAGTCTCAGCTGG  
ACAGCCTGCTGGGCCTGTACCACCTGCTGGACTGGTTTGCCGTGGATGAGTCCAACGAGGTGGA  
CCCCGAGTTCTCTGCCCGGCTGACCGGCATCAAGCTGGAGATGGAGCCTTCTCTGAGCTTCTAC  
AACAAAGGCCAGAAATTATGCCACCAAGAAGCCCTACTCCGTGGAGAAGTTCAAGCTGAACCTTCA  
GATGCCTACACTGGCCCGGGGCTGGGACGTGAATCGGAGAGAACAATGGCGCCATCCTGTTT  
GTGAAGAACGGCCTGTACTATCTGGGCATCATGCCAAAGCAGAAGGGCAGGTATAAGGCCCTGA  
GCTTCGAGCCACAGAGAAAACCAGCGAGGGCTTTGATAAGATGTAATGACTACTTCCCTGAT  
GCCGCCAAGATGATCCCAAAGTGACAGACCCAGCTGAAGGCCGTGACAGCCACTTTCAGACCC  
ACACAACCCCATCCTGCTGTCCAACAATTCATCGAGCCTCTGGAGATCACAAGGAGATCTAC  
GACCTGAACAATCCTGAGAAGGAGCCAAAGAAGTTTCAGACAGCCTACGCCAAGAAAACCGGCG  
ACCAGAAGGGCTACAGAGAGGCCCTGTGCAAGTGGATCGACTTCACAAGGGATTTTCTGTCCAA  
GTATACCAAGACAACCTCTATCGATCTGTCTAGCCTGCGGCCATCCTCTCAGTATAAGGACCTGGG  
CGAGTACTATGCCGAGCTGAATCCCCTGCTGTACCACATCAGCTTCCAGAGAATCGCCGAGAAGG  
AGATCATGGATGCCGTGGAGACAGGCAAGCTGTACCTGTTCCAGATCTATAACAAGGACTTTGCC  
AAGGGCCACCACGGCAAGCCTAATCTGCACACACTGTATTGGACCGGCCTGTTTTCTCCAGAGAA  
CCTGGCCAAGACAAGCATCAAGCTGAATGGCCAGGCCGAGCTGTTCTACCGCCCTAAGTCCAGG  
ATGAAGAGGATGGCACACCGGCTGGGAGAGAAGATGCTGAACAAGAAGCTGAAGGATCAGAAAA  
CCCCAATCCCCGACACCCTGTACCAGGAGCTGTACGACTATGTGAATCACAGACTGTCCCACGAC  
CTGTCTGATGAGGCCAGGGCCCTGCTGCCAACGTGATCACCAGGAGGTGTCTCACGAGATCA  
TCAAGGATAGGCGCTTACCAGCGACAAGTTCTTTTTCCACGTGCCTATCACACTGAACTATCAGG  
CCGCCAATTCCCATCTAAGTTCAACCAGAGGGTGAATGCCTACCTGAAGGAGCACCCCGAGAC  
ACCTATCATCGGCATCGATCGGGGCGAGAGAAACCTGATCTATATCACAGTGATCGACTCCACCG  
GCAAGATCCTGGAGCAGCGGAGCCTGAACACCATCCAGCAGTTTGATTACCAGAAGAAGCTGGA  
CAACAGGGAGAAGGAGAGGGTGGCAGCAAGGCAGGCCTGGTCTGTGGTGGGCACAATCAAGG  
ATCTGAAGCAGGGCTATCTGAGCCAGGTCATCCACGAGATCGTGGACCTGATGATCCACTACCAG  
GCCGTGGTGGTGTGGAGAACCCTGAATTTCCGCTTTAAGAGCAAGAGGACCGGCATCGCCGAGA  
AGGCCGTGTACCAGCAGTTCGAGAAGATGCTGATCGATAAGCTGAATTCCTGGTGTGAAGGA  
CTATCCAGCAGAGAAAGTGGGAGGCGTGTGAACCCATACCAGCTGACAGACCAGTTCACCTCC  
TTTGCCAAGATGGGCACCCAGTCTGGCTTCCCTGTTTACGTGCCTGCCCATATACATCTAAGATC  
GATCCCCTGACCGGCTTCGTGGACCCCTTCGTGTGAAAACCATCAAGAATCACGAGAGCCGCA

AGCACTTCCTGGAGGGCTTCGACTTTCTGCACTACGACGTGAAAACCGGCGACTTCATCCTGCA  
CTTTAAGATGAACAGAAATCTGTCCTTCCAGAGGGGCTGCCCGGCTTTATGCCTGCATGGGATAT  
CGTGTTCGAGAAGAACGAGACACAGTTTGACGCCAAGGGCACCCCTTTCATCGCCGGCAAGAGA  
ATCGTGCCAGTGATCGAGAATCACAGATTCACCGGCAGATACCGGGACCTGTATCCTGCCAACGA  
GCTGATCGCCCTGCTGGAGGAGAAGGGCATCGTGTTCAGGGATGGCTCCAACATCCTGCCAAAG  
CTGCTGGAGAATGACGATTCTCACGCCATCGACACCATGGTGGCCCTGATCCGCAGCGTGCTGC  
AGATGCGGAACTCCAATGCCGCCACAGGCGAGGACTATATCAACAGCCCCGTGCGCGATCTGAA  
TGCGTGTGCTTCGACTCCCGGTTTCAGAACCCAGAGTGGCCCATGGACGCCGATGCCAATGGC  
GCCTACCACATCGCCCTGAAGGGCCAGCTGCTGCTGAATCACCTGAAGGAGAGCAAGGATCTGA  
AGCTGCAGAACGGCATCTCCAATCAGGACTGGCTGGCCTACATCCAGGAGCTGCGCAACAAAAG  
GCCGGCGGCCACGAAAAAGGCCGGCCAGGCAAAAAAGAAAAAGCGATCCATCCCATACGATGTT  
CCAGATTACGCTTATCCCTACGACGTGCCTGATTATGCATACCCATATGATGTCCCGGACTATGCC

Cyon: en-AsCas12a (WT), Yellow: nucleoplasmin NLS, Green: linker, Gray: HA-tag

## 6. pET28-en-AsCas12a

CATCATCATCATCATCATGTGTACCCCTACGACGTGCCCGACTACGCCGAATTGCCTCCAAAAAAG  
AAGAGAAAGGTAATGACACAGTTTGAAGGCTTACCAATCTCTACCAGGTCAGCAAGACGCTACG  
TTTTGAGCTTATCCCGCAGGGAAAAACCCTGAAACACATTACGGAACAGGGGTTTCATAGAGGAAG  
ATAAGGCGCGTAACGACCATTATAAAGAACTGAAGCCTATAATCGACCGTATTTATAAAACGTACGC  
GGATCAGTGCCTGCAGCTGGTTCAGCTGGATTGGGAGAATCTGTCCGCGGCTATTGATAGCTATC  
GCAAAGAGAAGACCGAGGAAACCCGTAACGCACTGATTGAAGAGCAGGCGACCTATCGGAATGC  
GATCCATGATTACTTCATCGGCCGCACCGACAACCTGACCGATGCAATTAACAAACGTCACGCAG  
AGATTTACAAAGGTCTGTTTAAAGCAGAGTTATTCAATGGCAAGGTTCTGAAACAGCTGGGTACGG  
TCACCACCACCGAACACGAAAACGCACTGCTGAGGAGCTTTGATAAATTTACCACATATTTTCAGCG  
GTTTCTATCGTAAATCGTAAGAATGATTTAGCGCCGAAGATATTTCCACCAGCAATTCCTCATCGTATT  
GTGCAGGATAATTTCCGAAGTTTAAAGAAAATTGTCATATTTTACCCGTCTGATCACCGCGGTAC  
CGAGCCTGCGAGAGCATTGAAAACGTTAAGAAAGCCATTGGAATTTTGTGAGTACCAGCATTG  
AAGAAGTGTTCGTTCCCGTTCTATAACCAACTGCTGACCCAGACCCAGATTGATCTGTACAATC  
AGCTGCTGGGGGGCATAAGCCGCGAGGCAAGTACCGAAAAGATAAAGGGACTCAATGAGGTGCT  
GAATCTGGCAATTCAGAAGAATGATGAAACGGCTCATATCATTGCTAGCCTGCCGCATCGTTTCAT  
TCCCCTGTTAAGCAAATCCTGAGCGATCGCAATACACTGAGCTTTATCCTCGAAGAGTTTAAATC  
GGACGAAGAAGTTATCCAGAGCTTTTGCAAATACAAAACCCTGCTGCGGAACGAAAATGTGCTGG  
AGACCGCTGAAGCACTGTTAATGAACTGAACTCGATCGACCTCACCCATATTTTATATCCACAA  
AAAACGAAACCATAAGCAGCGCTCTGTGTGACCATTGGGATACCCTGCGCAACGCCCTGTATG  
AACGGCGTATCAGCGAGCTGACCGGGAAAATCACCAAATCCGCAAAGGAAAAAGTTTCAGCGTAG  
TCTGAAACACGAGGACATCAACCTGCAAGAAATATTAGCGCAGCAGGTAAAGAGCTGAGCGAAG  
CATTCAAACAGAAAACCAGCGAAATCCTGAGCCATGCCCATGCTGCACTGGATCAGCCGCTGCC  
GACCACCCTGAAAAACAGGAGGAAAAGGAGATTCTGAAAAGCCAATGGACAGCCTGCTGGGC  
CTGTATCACCTGCTGGACTGGTTTGCAGTCGATGAGAGCAACGAGGTTGATCCTGAGTTCTCCGC  
TCGTCTGACCGGAATCAAGCTGGAGATGGAACCGAGTCTGTGTTTTACAACAAAGCGCGTAATT  
ACGCGACCAAGAAACCGTATAGCGTGAAAAAATCAAATGAACTTTTCAGATGCCGACCCTTGCA  
CGTGGATGGGACGTTAACCGTAAAAAACAATGGGGCAATTTCTGTTTGTAAAAATGGCCTCTAT  
TATCTGGGTATCATGCCGAAACAGAAAGGGCGCTACAAAGCCCTGTCATTTGAGCCGACCGAGAA  
AACCTCAGAGGGTTTCGACAAGATGTACTACGATTATTTCCCGGATGCGGCAAAAATGATACCCAA  
ATGTAGCACCCAACTGAAGGCAGTTACAGCCCACTTTTCAGACCCATACCACCCCGATCCTGCTGT  
CGAACAATTTTATAGAGCCGCTGGAATTAACAAAGAGATTTATGATCTGAATAATCCGAAAAAGGA  
GCCAAGAAATTTTCAGACGGCGTATGCAAAAAAGACCGGGGATCAGAAAGGTTATCGTGAAGCG  
CTGTGCAAATGGATTGACTTTACCCGTGACTTTCTGTCAAAATATACCAAAACGACGAGCATTGATC  
TGAGCAGCCTACGTCAGCAGCAATATAAGGATCTGGGCGAATATTACGCCGAACTGAATCCG  
CTGCTCTACCATATTTCTTCCAACGAATCGCTGAAAAAGAAATAATGGACGCCGTTGAAACCGGC  
AAACTGTATCTGTTTCAAATCTACAACAAGATTTCCGCAAAGGCCATCACGGTAAGCCGAACCTG  
CATACCCTGATTGGACCGGTCTGTTTAGCCCGGAGAATCTGGCCAAAACCAGCATCAAGCTGAA

CGGACAGGCAGAACTGTTTTACCGCCCCAAAAGCCGTATGAAAAGGATGGCACACCGCCTGGGG  
GAAAAAATGCTGAATAAGAACTCAAAGATCAGAAAACGCCGATACCGGATACCCTTTATCAGGAG  
CTGTATGATTATGTTAACCACCGGCTGAGCCATGACCTGAGCGACGAAGCGCGTGCCTGCTGCC  
GAACGTGATTACCAAGGAAGTCTCGCATGAAATTATTAAGATCGGCGCTTACCAGTGATAAATTT  
TTCTTCCATGTACCGATCACCTGAATTATCAAGCCGCAAATAGCCCTTCAAATTTAATCAACGCG  
TGAATGCGTACCTGAAAGAGCATCCGGAGACCCCAATTATTGGCATAGACCGAGGAGAACGCAAT  
CTCATTATATCACCGTCATTGATAGCACCGGTAAGATCCTGGAACAGCGTAGCCTGAATACCATT  
AGCAGTTTGACTACCAGAAAAAGCTGGACAACAGAGAAAAGGAACGTGTAGCCGCCCGGCAGGC  
TTGGAGTGTGGTGGTACTATCAAGGATCTGAAGCAGGGGTATCTCTCCCAAGTTATCCATGAAAT  
TGTCGATCTAATGATTCACTATCAAGCAGTAGTGGTACTGGAAAATCTGAATTTCCGTTTCAAAGC  
AAACGTACAGGGATCGCTGAAAAAGCCGTTTATCAGCAGTTCGAGAAAATGCTGATAGACAAGCT  
GAATTGCCTGGTTCTGAAAGATTATCCGGCAGAGAAGGTGGGCGGTGTGCTGAACCCGTACCAG  
CTGACTGATCAATTTACGAGCTTTGCAAAAATGGGAACGCAGAGCGGTTTCTGTTCTATGTTCCG  
GCGCCATATACCAGCAAGATAGACCCGCTGACAGGTTTCGTAGATCCGTTTGTCTGGAAAACCATT  
AAAAATCATGAAAGTCGCAAACATTTTCTGGAGGGCTTTGATTTTCTGCACTATGACGTGAAAACC  
GGCGACTTCATTCTGCATTTTAAATGAACCGTAATCTGTCTTTTACGCGCGGCCTGCCTGGCTTT  
ATGCCGGCGTGGGACATTGTTTTTGAAGAATGAGACACAGTTTGTATGCCAAAGGTACCCCTT  
TATTGCGGGGAAACGCATTGTGCCCGTTATAGAAAATCACCGCTTACCAGGACGGTATAGGGACT  
TGTAACCCGGCAAATGAATTGATAGCGCTGCTGGAGGAGAAAGGTATTGTCTTTCCGGATGGATCA  
AACATCCTGCCGAAGCTGCTGGAGAACGATGACAGCCACGCAATAGACACCATGGTAGCGCTGA  
TCCGAAGCGTGTGAGATGCGTAACAGTAATGCGGCTACGGGGGAAGACTACATTAATAGCCCG  
GTCCGTGATCTGAACGGCGTTTGTTCGATAGCAGATTTCAAATCCGGAGTGGCCGATGGATGC  
CGATGCCAATGGAGCTTACCATATCGCTCTCAAAGGTCAGCTCCTACTGAACCATTGAAAGAATC  
AAAAGATCTGAAACTGCAGAACGGCATCTCGAATCAGGACTGGCTGGCCTACATTCAAGAACTGA  
GAAACGACTACAAAGACCATGACGGTGATTATAAGATCATGACATCGATTACAAGGATGACGATG  
ACAAG

Green: 6His-tag, Magenta : HA-tag, Yellow: SV40 NLS, Cyan: en-AsCas12a (WT), Gray: 3X FLAG

## Information of the amino acid sequence for en-AsCas12a used in this study

### 7. CMV-en-AsCas12a

MTQFEGFTNLYQVSKTLRFELIPQGKTLKHIQEQGFIEEDKARNDHYKELKPIIDRIYKTYADQCLQLVQ  
LDWENLSAAIDSYRKEKTEETRNLIEEQATYRNAIHDFYIGRTDNLTDAINKRHAEIYKGLFKAELFNG  
KVLKQLGTVTTTEHENALLRSFDKFTTYFSGFYNRKNVFSAEIDTAIPHRIVQDNFQPKFKENCHIFTR  
LITAVPSLREHFENVKKAIGIFVSTSIIEVFSFPFYNQLLTQTQIDLYNQLLGGISREAGTEKIKGLNEVLN  
LAIQKNDETAHIIASLPHRFIPLFKQILSDRNTLSFILEEFKSDEEVIQSFCKYKTLRNENVLETAELFN  
ELNSIDLTHIFISHKLETISSALCDHWDTLRNALYERRISELTGKITKSAKEKVQRSLKHEDINLQEIISAA  
GKELSEAFKQKTSEILSHAAALDQPLPTLKKQEEKEILKSQLDSSLGLYHLLDWFVAVDESNEVDPEF  
SARLTGIKLEMPSLSFYNKARNYATKKPYSVEKFLNFQMPTLARGWDVNRKKNNGAILFVKNGLYY  
LGIMPKQKGRYKALSFEPTEKTSEGFDKMYDYFPDAAKMIPKCSTQLKAVTAHFQTHHTPILLSNNFI  
EPLAITKEIYDLNPEKEPKFKQAYAKKTGDQKGYREALCKWIDFTRDFLSKYTKTTSIDLSSLRPSSQ  
YKDLGEYYAELNPLLYHISFQRIAEKEIMDAVETGKLYLFQIYNKDFAKGHHGKPNLHTLYWTGLFSPE  
NLAKTSIKLNGQAELFYRPKSRMKRMAHRLGEKMLNKKLKDQKTIPIPTLYQELYDVNHRLSHDLS  
EARALLPNVITKEVSHEIHKDRRFTSDKFFFHVPITLNYQAANSKFNQRVNAYLKEHPETPIIGIDRGE  
RNLIIYITVIDSTGKILEQRSLNTIQQFDYQKLDNREKERRAARQAWSVVGTIKDLKQGYLSQVIHEIVD  
LMIHYQAVVLENLNFGFKSKRTGIAEKAVYQQFEKMLIDLKLNCLVLKDYPAEKVGGLNPNYQLTDQFT  
SFAKMGTQSGFLFYVPAPYTSKIDPLTGFVDPFVWTKIKNHESRKHFLGEGDFLHYDVKTGDFILHFK  
MNRNLSFQRGLPGFMPAWDIVFEKNETQFQDAKGTPIAGKRIVPVENHRFTGRYRDLYPANELIALLE  
EKGIVFRDGSNILPKLENDSDHAIDTMVALIRSVLQMRNSNAATGEDYINSPVRDLNNGVCFDSRFQN  
PEWPMADANGAYHIALKGQLLNHLKESKDLKLQNGISNQDWLAYIQELRNKRPAATKKAGQAKKK  
KSSYPYDVPDYAYPYDVPDYAYPYDVPDYA

## 8. pET28-en-AsCas12a

HHHHHMYPYDVPDYAELPPKKKRKVMTQFEGFTNLYQVSKTLRFELIPQGKTLKHIQEQGFIEEDKARNDHYKELKPIIDRIYKYADQCQLVQLDWNLSAAIDSYRKEKTEETRNALIEEQATYRNAIHDFIGRTDNLTDAINKRHAEIYKGLFKAELFNGKVLKQLGTVTTTEHENALLRSFDKFTTYFSGFYRNRKNVFS AEDISTAIPHRIVQDNFPKFKENCHIFTRLITAVPSLREHFENVKKAIGIFVSTSIEEVFSFPFYNQLLTQT QIDLYNQLLGGISREAGTEKIKGLNEVLNLAIQNDETAHIIASLPHRFIPLFKQILSDRNTLSFILEEFKSD EEVIQSFCKYKTLRNENVLETAEALFNELNSIDLTHIFISHKKLETISSALCDHWDTLRNALYERRISELT GKITKSAKEKVQRSLKHEDINLQEIISAAGKELSEAFKQKTSEILSHAHAALDQPLPTTLKKQEEKEILKS QLDSSLGLYHLLDWFVAVDESNEVDPEFSARLTGIKLEMPSLSFYNKARNYATKKPYSVEKFKLNFQM PTLARGWDVNRKNNNGAILFVKNGLYYLGIMPKQKGRYKALSFEPTTEKTSEGFDMYYDYFPDAAKM IPKCSTQLKAVTAHFQTHTPILLSNNFIEPLEITKEIYDLNPEKEPKKFQAYAKKTGDQKGYREALCK WIDFTRDFLSKYTKTTSIDLSSLRPSSQYKDLGEYYAELNPLLYHISFQRIAEKEIMDAVETGKLYLFQIY NKDFAKGHHGKPNLHTLYWTGLFSPENLAKTSIKLNGQAELFYRPKSRMKRMAHRLGEKMLNKKLKD QKTPIPDTLYQELYDVNHRLSHDLSDPEARALLPNVITKEVSHEIHKDRRFTSDKFFFHVPITLNYQAN SPSKFNQRVNAVYKKEHPETPIIGIDRGERNLIYITVIDSTGKILEQRSLNTIQQFDYQKKLDNREKERVAA RQAWSVVGTIKDLKQGYLSQVIHEIVDLMIHYQAVVVLENLNFQFVSKRTGIAEKAVYQQFEKMLIDKL NCLVLKDYPAEKVGVLNPNYQLTDQFTSFAKMGTQSGFLFYVPAPYTSKIDPLTGFVDPFVWKTIKNH ESRKHFLEGFDLHYDVKTGDFILHFKMNRNLSFQRGLPGFMPAWDIVFEKNETQFDAQGTPFIAGKR IPVIENHRFTGRYRDLYPANELIALLEEKIVFRDGSNILPKLLENDDSHAITMVALIRSVLQMRNSNA ATGEDYINSPVRDLNGVCFDSRFQNPPEWPMADANGAYHIALKGQLLNHLKESKDLKLQNGISNQD WLAYIQELRNDYKDHDGDYKDHDIDYKDDDDK

## References

1. Bae, S, Park, J, and Kim, JS (2014). Cas-OFFinder: a fast and versatile algorithm that searches for potential off-target sites of Cas9 RNA-guided endonucleases. *Bioinformatics* **30**: 1473-1475.
